# Supplementary material for: Effects of antiplatelet therapy after stroke due to intracerebral haemorrhage (RESTART): a randomised, open-label trial
Source: PubMed Central journal article supplement (PMC6617509; doi:10.1016/s0140-6736(19)30840-2), 2019-06-29
Supplement: mmc1.pdf [file mmc1.pdf]

# THE LANCET

## Supplementary appendix

This appendix formed part of the original submission and has been peer reviewed. We post it as supplied by the authors.

Supplement to: RESTART Collaboration. Effects of antiplatelet therapy after stroke due to intracerebral haemorrhage (RESTART): a randomised, open-label trial. *Lancet* 2019; published online May 22. [http://dx.doi.org/10.1016/S0140-6736\(19\)30840-2](http://dx.doi.org/10.1016/S0140-6736(19)30840-2).

- 1 **Effects of antiplatelet therapy after stroke due to intracerebral haemorrhage: a randomised, open-label trial**
- 2 Online appendix

3 **Appendix of collaborators on delegation logs at hospital sites that recruited at least one participant to RESTART**

4 Sites are listed in descending order of cumulative recruitment (quantified in square brackets), indicating which people  
5 took the role of principal investigator (PI).

6  
7 **Edinburgh Royal Infirmary, Edinburgh [39]** (Prof. R Al-Shahi Salman (PI), Prof. G Mead, S Burgess, C Lerpiniere, R  
8 O'Brien, R Paulton, F Doubal, K McCormick, N Hunter, P Taylor, R Parakramawansha, J Perry, G Blair, A MacRaid);  
9 **Salford Royal Foundation Trust, Manchester [21]** (A Parry-Jones (PI), K Shaw, I Burger, A Ingham, T Marsden, J  
10 Morell, Z Naing, J Perez, A Hall, R Jarapa, E Wood, V O'Loughlin, S Marshall, L Harrison, M Punter, S Lee, M  
11 Johnes); **Northwick Park Hospital, Harrow [18]** (D Cohen (PI), S Davies, K Njoku, M Mpelembue, L Burgess, R  
12 Licenik, M Ngwako, N Nisar, R Niranchanan, T Roganova, R Bathula, J Devine, A David, A Oshodi, F Guo, M Abdul-  
13 saheb, A Chandrakumar, A Chamberlain, R Ballantine, E Owoyele, V Sukdeo, P Poku); **Royal Hallamshire Hospital,**  
14 **Sheffield [13]** (K Harkness (PI), C Blank (PI), P Bayliss, E Richards, K Birchall, O Balitska, A Ali, F Kibutu, C Doyle, J  
15 Howe, C Kamara, K Stocks, Prof. A Majid, A Maatouk, L Barron, R Lindert, J Redgrave, K Dakin); **Torbay District**  
16 **General Hospital, Torquay [13]** (B Bhaskaran (PI), S Szabo, I Salih, D Kelly, D Tomlin, H Bearne, P Fitzell, J Buxton,  
17 G Ayres, H Bhakri, J Garfield-Smith, K Horan, A Saulat); **Southend University Hospital NHS Foundation Trust,**  
18 **Westcliff on Sea [12]** (P Guylar (PI), D Sinha (PI) T Loganathan, A Siddiqui, L Coward, S Tysoe, S Kunhunnu, S Shah,  
19 K Ng, N Menon, R Orath Prabakaran, S Kelavkar, S Rashmi, D Ngo); **Monklands Hospital, Airdrie [11]** (M Barber  
20 (PI), D Esson, F Brodie); **Morrison Hospital, Swansea [11]** (T Anjum (PI), M Wani (PI), M Krishnan, L Quinn, J  
21 Spencer, S Chenna, S Storton, T Jones, H Thompson-Jones, L Dacey, S Thomas, T Beaty, S Treadwell, C Davies, L  
22 Connor, S Tucker, G Gainard, P Slade); **University Hospitals of North Midlands NHS Trust, Stoke-on-Trent [11]** (G  
23 Muddegowda (PI), R Sanyal (PI), S Stevens, A Butler, R Varquez, A Remegoso, N Abano, F Alipio, H Denic, R Carpio,  
24 C Causley, A Moores, S Lyjko, Prof. C Roffe, J Hiden, P Ferdinand, A Barry, H Maguire, J Grocott, K Finney); **Victoria**  
25 **Hospital, Kirkcaldy [11]** (V Cvorov (PI), M Couser, K Ullah, N Chapman, K McCormick, S Mcauley, S Pound); **City**  
26 **Hospital, Nottingham [10]** (S Raghunathan (PI), F Shelton, A Hedstrom, N Gilzeane, J Roffe, J Clarke, D Havard, A  
27 Buck, K Krishnan, M Godfrey, N Sprigg, S Sheikh, K Whittamore, R Keshvara, B Jackson, J Appleton, Z Law, O  
28 Matias, G Wilkes, C Jordan); **Hillingdon Hospital, Uxbridge [10]** (E Vasileiadis (PI), C Mason, A Parry, G Landers, M  
29 Holden, B Aweid); **Yeovil District Hospital, Yeovil [10]** (K Rashed (PI), L Balian, C Vickers, B Williams-Yesson, E  
30 Keeling, S Board, J Allison, C Buckley, J Board, D Wood, T Pitt-Kerby, A Tanate); **Doncaster Royal Infirmary,**  
31 **Doncaster [9]** (M Kini (PI), D Walstow, D Chadha, R Fong); **North Middlesex University Hospital, London [9]** (R  
32 Luder (PI), T Adesina, J Gallagher, M Bhargava, C van Someren, E Murali, H Bridger); **Royal Cornwall Hospital,**

33 **Truro [9]** (F Harrington (PI), A James, K Adie, A Mate, G Courtauld, C Schofield, K Bond, L Lucas, B Maund, S Ellis);  
34 **Royal Devon & Exeter Hospital, Exeter [9]** (P Mudd (PI), M James, S Keenan, A Bowring, J Cageao, D Strain, H  
35 Kingwell, C Roughan, A Hemsley, J Sword, K Miller, A Goff, K Gupwell, K Thorpe); **Royal Preston Hospital, Preston**  
36 **[9]** (H Emsley (PI), S Puneekar (PI), A McLoughlin, S Sultan, B Gregory, S Raj, D Doyle); **Queen Elizabeth University**  
37 **Hospital, Glasgow [9]** (Prof. K Muir (PI), W Smith, N Day, A Welch, F Moreton, B Cheripelli, D Kalladka, X Huang, S  
38 El Tawil, S Ramachandran, C Crosbie, J Elliot); **Guys & St Thomas, London [8]** (Prof. T Rudd (PI), A Bhalla, J Birns,  
39 K Marks, S Kullane); **Southampton General Hospital, Southampton [8]** (N Weir (PI), C Allen, V Pressly, E  
40 Battersby-Wood, P Crawford, S Egerton, A Blades, G Howard, J Marigold, S Evans, A Walters, F Smith, I Gartrell, C  
41 Cox, R Creeden, S Smith, C Boxall); **Ystrad Mynach Hospital, Ystrad Mynach, Newport [8]** (J Hewitt (PI), C Nott, S  
42 Procter, S Buckle, J Whiteman, C Triscott, R Mardania, R Wallace, J Gray); **Calderdale Royal Hospital, Halifax [7]** (A  
43 Nair (PI), J Greig, P Rana, M Robinson, M Alam); **University College London Hospital, London [7]** (Prof D Werring  
44 (PI), I Jones, A Banaras, L Crook, C Watchurst, M Brezitski, K Patel, D Wilson, R Erande, C Hogan, N Oji, N Francia,  
45 A Ashton, S Feerick, I Hostettler, T Al-Mayhani, E Elliott); **Altnagelvin Hospital, Derry/Londonderry [6]** (M  
46 McCarron (PI), J McKee, M Doherty, F McVerry, C Blair); **Bristol Royal Infirmary, Bristol [6]** (C Holmes (PI), S  
47 Caine (PI), M Osborn, E Dodd, P Murphy, N Devitt, P Baker, A Steele, L Guthrie, S Clarke); **Gloucestershire Royal**  
48 **Hospital, Gloucester [6]** (D Dutta (PI), P Brown, D Ward, F Davis, J Turfrey, R Bakawala, C Hughes, K Collins, S  
49 O'Connell, J Glass); **James Cook University Hospital, Middlesbrough [6]** (D Broughton (PI), D Tryambake (PI), L  
50 Dixon, K Chapman, A Young, A Bergin, A Sigsworth); **Kings Mill Hospital, Mansfield [6]** (M Cooper (PI), M Nasar, I  
51 Wynter, A Rajapakse); **Leeds General Infirmary, Leeds [6]** (A Hassan (PI), M Kambafwile, L Makawa, D Waugh, E  
52 Veraque, M Randall, V Papavasileiou); **Royal Liverpool and Broadgreen University Hospital, Liverpool [6]** (A  
53 Manoj (PI), M Wilkinson, G Fletcher, P Lopez, P Cox, P Fitzsimmons, N Sharma); **Royal United Hospital, Bath [6]** (J  
54 Choulerton (PI), B Madigan, D Button, L Dow, L Gbadamoshi, J Avis, S McCann, L Shaw, D Howcroft, S Lucas, A  
55 Stone); **St Georges Healthcare NHS Trust, London [6]** (G Cluckie (PI), C Lovelock (PI), B Patel, B Clarke, N Chopra,  
56 K Kennedy, R Williams, L Kerin, N Jeyaraj, L Choy, N Clarke, F Watson, S Trippier, B Moynihan, U Khan, N Dayal, C  
57 Orefo, T Adedoyin, R Ghatala, A Blight, V Jones, J O'Reilly); **The Royal Bournemouth Hospital, Bournemouth [6]**  
58 (K Thavanesan (PI), D Tiwari (PI), C Cox, J Roberts, B Jupp, M Keltos, A Iqbal, C Bagnall, L Tucker, A Ljubez, O  
59 David, E Rogers, C Ovington, J Bell, B Longland, G Hann); **University Hospital Aintree, Liverpool [6]** (C Cullen (PI),  
60 H Thant, T Ingram, M Zoe, J Peters, V Sutton, R Durairaj, D Shackcloth, J Ewing, S Stevenson, M Harrison); **University**  
61 **Hospital of North Tees, Stockton [6]** (I Anwar (PI), B Kumar, H Skinner, T Nozedar, D McArdle, S Crawford, A  
62 Annamalai, A Ramshaw); **Western General Hospital, Edinburgh [6]** (Prof. M Dennis (PI), Prof. C Sudlow, W

63 Whiteley, C Lerpiniere, Prof. R Al-Shahi Salman, R Fraser); **Aberdeen Royal Infirmary, Aberdeen [5]** (M MacLeod  
64 (PI), J Irvine, A Joyson, H Gow, J Furnace, B Jagpal, S Ross, S Nelson, R Clarke, N Crouch, K Klaasen, B MacLennan,  
65 V Taylor); **Addenbrooke's Hospital, Cambridge [5]** (E O'Brien (PI), S Finlay, H Hayhoe, D Handley, S Kelly, J  
66 Francis, N Hannon, G Zachariah, J Mcgee, J Mitchell, E Amis, J Sesay, S Crisp); **Barnet Hospital, Barnet [5]** (D  
67 Epstein (PI), A Shukla, I Jones, V Krishnamurthy, P Nicholas, A Webber, S Qureshi, J Penge); **Bradford Royal  
68 Infirmary, Bradford [5]** (H Ramadan (PI), S Maguire, C Patterson, R Bellfield, B Hairsine, O Quinn, M Hooley, K  
69 Stewart); **John Radcliffe Hospital, Oxford [5]** (U Schulz (PI), R Teal, P Mathieson, I Reckless, J Kennedy, Prof. G  
70 Ford, G Lenti, G Harston); **Nevill Hall Hospital, Abergavenny [5]** (B Richard (PI), S Buckle, S Procter, S Moseley, C  
71 Nott, J Whiteman, C Triscott, R Wallace, M Edwards, H Lawson, M Tayler); **The Royal London Hospital, London [5]**  
72 (T Harrison (PI), K Saastamoinen (PI), A Salek-Haddadi, D Hove, L Howaniec, G Grimwood, O Redjep, F Humphries, S  
73 Amlani, L Cuenoud, E Erumere, G Auld, L Argandona); **University Hospital North Durham, Durham [5]** (Y Pai (PI),  
74 M Dhakal (PI), S Dima (PI), B Esihi (PI), G Smith, M Garside, D Bruce, R Hayman, S Clayton, E Brown, G Rogers, M  
75 Naeem, V Baliga); **University Hospital of Wales, Cardiff [5]** (T Hughes (PI), B Morse, S White, S Schwarz, E  
76 Tallantyre, A Osman, H De Berker, B Jelley); **Wythenshawe Hospital, Manchester [5]** (E Gamble (PI), B Charles, R  
77 Grue, A Chaudhry, S Blane, A Hague, C Lambert); **Ayr Hospital, Ayr [4]** (S Ghosh (PI), D Gilmour, E Barrie, M  
78 Henry); **Charing Cross Hospital, London [4]** (M Venter (PI), A Kar (PI), S Mashate, K Harvey, L Gardener, V  
79 Nguyen, B Hazel, O Geraghty, O Halse, P Wilding, V Tilley); **Derby Royal Hospital, Derby [4]** (Prof. T England (PI),  
80 A Hedstrom, M Maddula, Prof. R Donnelly); **Heartlands Hospital, Birmingham [4]** (R Yadava (PI), K Azhar (PI), M  
81 Sangombe, J Reddan, S Stafford); **New Cross Hospital, Wolverhampton [4]** (K Fotherby (PI), D Morgan, F Baig, K  
82 Jennings-Preece, D Butler, N Ahmad, B Rai, A Stevens, A Willberry); **Queen Alexandra Hospital, Portsmouth [4]** (P  
83 Siddegowda (PI), L Hyatt, A Saulat, J Tandy, P Howard, T Dobson, D Jarrett, S Ponnambath, S Valentine, C James, R  
84 Butler, Y Harrington-Davies, A Suttling); **Queen Elizabeth Hospital, Gateshead [4]** (B Esihi (PI), T Cassidy (PI), B  
85 McClelland, M Bokhari); **Raigmore Hospital, Inverness [4]** (P Findlay (PI), A Macaden, I Shread, C Barr); **Royal  
86 Infirmary, Glasgow [4]** (Prof. P Langhorne (PI), G Kerr, F Wright, R Graham, C McAlpine, L Humphreys, M Iqbal);  
87 **Royal Surrey County Hospital, Guildford [4]** (K Pasco (PI), O Balazikova, A Nasim, C Peixoto, S Shahmehri, L  
88 Gallagher); **William Harvey Hospital, Ashford [4]** (T Webb (PI), L Cowie, A Thomson, H Rudenko, A Verrion, E  
89 Beranova, T Cosier, S Walker, S McDonald, N Schumacher); **Derriford Hospital, Plymouth [3]** (A Mohd Nor (PI), C  
90 Eglinton, N Persad, C Brown, M Weinling, A Shah, J Baker, B Hyams); **Forth Valley Royal Hospital, Larbert [3]** (A  
91 Byrne (PI), C McGhee, A Smart, C Copeland); **Hull Royal Infirmary, Hull [3]** (R Rayessa (PI), L Wilson, C Naylor, A  
92 Rodgers, S Wilson, E Clarkson); **Pinderfields Hospital, Wakefield [3]** (M Carpenter (PI), M Walker, R Davey, A

93 Needle, R Fathima, G Bateman, A Stanners, P Datta, L Jackson, J Ball); **Royal Victoria Infirmary, Newcastle upon**  
94 **Tyne [3]** (M Davis (PI), H Guy, N Atkinson, M Fawcett, T Thompson, C Hays, S Woodward, V Hogg); **Salisbury**  
95 **District Hospital, Salisbury [3]** (T Black (PI), A Anthony, S Miriam, C Clarke, D Mead, M Tribbeck, J Cronin, R  
96 Fennelly); **St Mary's Hospital, Newport Isle of Wight [3]** (M Haque (PI), E Hakim (PI), S Symonds, M Maanoosi, J  
97 Herman); **St Richards Hospital, Chichester [3]** (S Ivatts (PI), Y Baird, M Sally, I Amey, L Clayton- Evans, S Newton, I  
98 Chadbourn); **Victoria Hospital, Blackpool [3]** (J McIlmoyle (PI), C Jeffs, C Dickinson, J Howard, S Anwar, S Dhar, K  
99 Jones, M Siddiq, C Clay); **Arrowe Park Hospital, Wirral [2]** (R Davies (PI), P Owings, G Sangster, V Gott, V Little, P  
100 Weir, S Cherian, D Jose, H Moroney, S Downham, A Dodd, L Codd, V Vettimootal Johnson, N Robinson); **Barnsley**  
101 **Hospital NHS Foundation Trust, Barnsley [2]** (A Ahmed (PI), M Albazzaz (PI), S Johnson, C Denniss, T Zahoor, M  
102 Cunningham); **Countess of Chester NHS Foundation Trust, Chester [2]** (T Webster (PI), K Chatterjee, A Nallasivan,  
103 S Haider, S Leason, C Perkins, S Seagrave); **Hereford County Hospital, Hereford [2]** (C Jenkins (PI), F Price, C  
104 Hughes, L Mercer); **Leicester Royal Infirmary, Leicester [2]** (D Eveson (PI), A Mistri, L Manning, C Patel, M  
105 Moqsith, S Khan, C Stephens, S Sattar, M Lam, K Musarrat); **Leighton Hospital, Crewe [2]** (L Kalathil (PI), R Miller,  
106 M Salehin, N Gautam, D Bailey, K Amor, J Meir); **Luton & Dunstable NHSFT University Hospital, Luton [2]** (L  
107 Sekaran (PI), F Justin, M Tate, K Bharaj, R Simon, N Mohammed, S Sethuraman, D Phiri, M Chauhan); **Musgrove**  
108 **Park Hospital, Taunton [2]** (M Hussain (PI), S Brown, M Harvey, R Whiting, M Khan, J Homan, L Foote, N Hunt, A  
109 Whitcher, C Pawley, E Foster, J Foot, H Durman, L Brotherton); **Norfolk & Norwich University Hospital, Norwich [2]**  
110 (K Metcalf (PI), J Jagger, S McDonald, K Waterfield, P Sutton, J Saada, A Wiltshire, R Perfitt, R Greenwood, N Shinh,  
111 A Anversha, G Ravenhill); **Pilgrim Hospital, Boston [2]** (D Mangion (PI), S Markova, A Hardwick, T Lawrence, J  
112 Fletcher, C Constantin, K Pettitt, I Thomas); **Queens Hospital, Romford [2]** (S Andole (PI), N Gadapa, K Dunne, M  
113 Krommyda, E Bursens, C Plewa, S King); **Royal Hampshire County Hospital, Winchester [2]** (N Smyth (PI), J  
114 Wilson, E Giallombardo, C Eglinton, L Sykes); **Royal Lancaster Infirmary, Lancaster [2]** (P Kumar (PI), P Thomas, I  
115 Dunn, C Culmsee, I Huggett, J Barker); **Royal Victoria Hospital, Belfast [2]** (I Wiggam (PI), A Wallace, E Kerr, A  
116 Fulton, A Hunter, S Tauro, S Cuddy); **Solihull Hospital, Solihull [2]** (K Elfandi (PI), U Khan, S Stafford, J Reddan);  
117 **Sunderland Royal Hospital, Sunderland [2]** (M Myint (PI), R O'Brien (PI), H Brew, N Majmudar, J OConnell, G  
118 Bunea, C Fox, D Gulliver, N Sattar, B Mokoena, A Smith, E Osborne, R Krishnamurthy); **Ulster Hospital, Belfast [2]**  
119 (D Wilson (PI), B Wroath, K Dynan, M Power, S Thompson, V Adell); **West Cumberland Hospital, Whitehaven [2]**  
120 (E Orugun (PI), U Poultney, H Crowther, R Glover, S Thornthwaite); **West Suffolk Hospital, Bury St Edmunds [2]** (A  
121 Nicolson (PI), L Wood, J Imam, J White); **Bedford Hospital, Bedford [1]** (H Ni (PI), C Graham, B Rahman, J Milligan,  
122 J Jose); **Chesterfield Royal Hospital, Chesterfield [1]** (M Sajid (PI), G Ghaly, M Ball, R Gascoyne); **Dorset County**

123 **Hospital NHS Foundation Trust, Dorchester [1]** (H Proeschel (PI), S Sharpe, S Horton, S Jones, E Beaves); **Epsom**  
124 **General Hospital, Epsom [1]** (J Putterill (PI), R Jha, R Gallifent, P Kakar); **Hairmyres Hospital, East Kilbride [1]** (B  
125 Yip (PI), M Bell, B MacInnes, L MacLiver, D Esson); **Lister Hospital, Stevenage [1]** (A Pusalkar (PI), K Chan, P  
126 Dangri, K Crabtree, H Beadle, A Cook); **Peterborough City Hospital, Peterborough [1]** (S Subramonian (PI), P  
127 Owusu-Agyei (PI), N Temple, N Butterworth-Cowin); **Poole Hospital, Poole [1]** (S Ragab (PI), K Knops, E Jinks, C  
128 Dickson, L Gleave, J Leggett, J Dube, T Garcia); **Prince Charles Hospital, Merthyr Tydfil [1]** (R Dewar (PI), K  
129 Thomas, J White); **Queen Elizabeth Hospital, Birmingham [1]** (D Sims (PI), J Hurley, M Willmot, C Sutton, E  
130 Littleton, S Maiden, J Cunningham, R Jones, C Green, M Bates); **Queen Elizabeth Hospital, Kings Lynn [1]** (R  
131 Shekhar (PI), R Crown, E Gilham, T Fuller, I Ahmed, K Waterfield); **Royal Blackburn Hospital, Blackburn [1]** (N  
132 Goorah (PI), A Bell, C Kelly, A Singh, J Walford, S Duberley, B Tomlinson, F Patel); **Royal Sussex County Hospital,**  
133 **Brighton [1]** (I Kane (PI), N Gainsborough, J Gaylard, J Breeds, Prof. C Rajkumar, S Hervey, A Pitt-Ford, L Latter, E  
134 Barbon, P Thompson); **Sandwell General Hospital, Birmingham [1]** (S Ispoglou (PI), R Evans, S Ankolekar, A  
135 Hayes); **South West Acute Hospital, Enniskillen [1]** (B Keegan (PI), M Doherty, J Kelly, C Blair); **Stepping Hill**  
136 **Hospital, Stockport [1]** (S Krishnamoorthy (PI), J Vassallo, D Walter, H Cochrane); **The Princess Royal Hospital,**  
137 **Telford [1]** (M Srinivasan (PI), F Hurford, D Donaldson, R Campbell, N Motherwell, I Mukherjee); **University**  
138 **Hospitals Coventry and Warwickshire, Coventry [1]** (A Kenton (PI), S Nyabadza, I Martin, B Hunt, H Hassan, B  
139 Dallol, S O'Toole).

140 **Literature search strategies used to put the research in context**

141

142 **CENTRAL search strategy**

143 #1 MESH DESCRIPTOR Basal Ganglia Hemorrhage EXPLODE ALL TREES

144 #2 MESH DESCRIPTOR Intracranial Hemorrhages

145 #3 MESH DESCRIPTOR Intracranial Hemorrhage, Hypertensive

146 #4 MESH DESCRIPTOR Cerebral Hemorrhage

147 #5 (brain\* or cerebr\* or cerebell\* or intracerebral or intracran\* or parenchymal or intraparenchymal or intraventricular or

148 infratentorial or supratentorial or putaminal or putamen or hemispher\* or stroke or apoplex\*):TI

149 #6 (basal and gangli\*):TI

150 #7 (posterior and fossa):TI,AB,KY

151 #8 (haemorrhag\* or hemorrhag\* or haematoma\* or hematoma\* or bleed\*):TI

152 #9 #5 or #6 or #7 and #8

153 #10 (ICH or ICHs):TI

154 #11 #1 or #2 or #3 or #4 or #9 or #10

155 #12 MESH DESCRIPTOR Anticoagulants EXPLODE ALL TREES

156 #13 MESH DESCRIPTOR Pipercolic Acids EXPLODE ALL TREES WITH QUALIFIERS AE,TU

157 #14 MESH DESCRIPTOR Vitamin K EXPLODE ALL TREES

158 #15 MESH DESCRIPTOR Thrombin EXPLODE ALL TREES WITH QUALIFIERS AI

159 #16 MESH DESCRIPTOR Factor Xa

160 #17 MESH DESCRIPTOR Blood Coagulation Factors EXPLODE ALL TREES WITH QUALIFIERS AI

161 #18 MESH DESCRIPTOR Blood Coagulation EXPLODE ALL TREES WITH QUALIFIERS DE

162 #19 MESH DESCRIPTOR Antithrombins EXPLODE ALL TREES

163 #20 MESH DESCRIPTOR Hirudin Therapy EXPLODE ALL TREES

164 #21 (anticoagul\* or antithromb\*):TI,AB,KY

165 #22 (Vitamin next K next antagonist\*):TI,AB,KY

166 #23 (VKA or VKAs):TI,AB,KY

167 #24 #22 or #23

168 #25 (direct\* NEAR5 thrombin):TI,AB,KY

169 #26 "DTI":TI,AB,KY



170 #27 (factor next Xa NEAR5 inhib\*):TI,AB,KY  
171 #28 (factor next 10a NEAR5 inhib\*):TI,AB,KY  
172 #29 (fXa NEAR5 inhib\*):TI,AB,KY  
173 #30 (autoprothrombin NEAR5 inhib\*):TI,AB,KY  
174 #31 (thrombokinas NEAR5 inhib\*):TI,AB,KY  
175 #32 (acenocoumarol\* or dicoumarol\* or ethyl next biscoumacetate\* or phenprocoumon\* or warfarin\* or ancrod\* or  
176 citric next acid\* or coumarin\* or chromonar\* or coumestro\* or esculi\* or ochratoxin\* or umbelliferone\* or dermatan  
177 next sulfate\* or dextran\* or edetic next acid\* or enoxaparin\* or gabexate\* or heparin\* or lmwh\* or nadroparin\* or  
178 pentosan next sulfuric next polyester\* or phenindione\* or protein next c or protein next s or tedelparin\*):TI,AB,KY  
179 #33 (tinzaparin or parnaparin or dalteparin or reviparin or danaparoid or lomoparan or org next 10172 or mesoglycan or  
180 polysaccharide next sulphate\* or sp54 or sp-54 or md805 or md-805 or cy222 or cy-222 or cy216 or cy-216):TI,AB,KY  
181 #34 (Marevan or Fragmin\* or Fraxiparin\* or Klexane):TI,AB,KY  
182 #35 (argatroban or MD805 or MD-805 or dabigatran or ximelagatran or melagatran or efegatran or flovagatran or  
183 inogatran or napsagatran or bivalirudin or lepirudin or hirudin\* or desirudin or desulfatohirudin or hirugen or hirulog or  
184 AZD0837 or bothrojaracin or odiparcil):TI,AB,KY  
185 #36 (xabans or antistasin or apixaban or betrixaban or du next 176b or eribaxaban or fondaparinux or idraparinux or  
186 otamixaban or razaxaban or rivaroxaban or yagin or ym next 150 or ym150 or LY517717):TI,AB,KY  
187 #37 #25 or #26 or #27 or #28 or #29 or #30 or #31 or #32 or #33 or #34 or #35 or #36  
188 #38 MESH DESCRIPTOR Platelet Glycoprotein GPIIb-IIIa Complex EXPLODE ALL TREES WITH  
189 QUALIFIERS AI,DE  
190 #39 MESH DESCRIPTOR Platelet Activation EXPLODE ALL TREES WITH QUALIFIERS DE  
191 #40 MESH DESCRIPTOR Blood Platelets EXPLODE ALL TREES WITH QUALIFIERS DE  
192 #41 (antiplatelet\* or anti-platelet\* or antiaggreg\* or anti-aggreg\* or (platelet\* NEAR5 inhibit\*) or (thrombocyt\* NEAR5  
193 inhibit\*)):TI,AB,KY #42 (alprostadi\* or aspirin\* or acetylsalicylic next acid or (acetyl ADJ salicylic and acid\*) or  
194 (acetyl-salicylic and acid or epoprostenol\* or ketanserin\* or ketorolac next tromethamine\* or milrinone\* or mopidamol\*  
195 or procainamide\* or thiophen\* or trapidil\* or picotamide\* or ligustrazine\* or levamisol\* or suloctidil\* or ozagrel\* or  
196 oky046 or oky-046 or defibrotide\* or cilostazol or satigrel or sarpogrelate or kbt3022 or kbt-3022 or isbogrel or cv4151  
197 or cv-4151)):TI,AB,KY  
198 #43 ((glycoprotein next iib\* near/5 inhib\*) or (glycoprotein next iib\* near/5 antag\*) or (gp next iib\* near/5 inhib\*) or (gp  
199 next iib\* near/5 antag\*) or GR144053 or GR-144053 or triflusal):TI,AB,KY

200 #44 (Argatroban or Beraprost or Cicaprost or Cilostazol or Clopidogrel or Dipyridamole or Iloprost or Indobufen or  
201 Lepirudin or Pentosan next Polysulfate or Pentoxifylline or Piracetam or Prostacyclin or Sulfinpyrazone or  
202 Sulphinpyrazone or Ticlopidine or Triflusal or Abciximab or Disintegrin or Echistatin or Eptifibatide or Lamifiban or  
203 Orbofiban or Roxifiban or Sibrafiban or Tirofiban or Xemilofiban or terutroban or picotamide or prasugrel):TI,AB,KY  
204 #45 (Dispril or Albyl\* or Ticlid\* or Persantin\* or Plavix or ReoPro or Integrilin\* or Aggrastat):TI,AB,KY  
205 #46 MESH DESCRIPTOR Platelet Aggregation Inhibitors EXPLODE ALL TREES

206 #47 #38 or #39 or #40 or #41 or #42 or #43 or #44 or #45 or #46

207 #48 #37 or #47

208 #49 #48 and #11

209

### 210 **MEDLINE search strategy**

211 1. exp basal ganglia haemorrhage/ or intracranial hemorrhages/ or cerebral haemorrhage/ or intracranial haemorrhage,  
212 hypertensive/

213 2. ((brain\$ or cerebr\$ or cerebell\$ or intracerebral or intracran\$ or parenchymal or intraparenchymal or intraventricular or  
214 infratentorial or supratentorial or basal gangli\$ or putaminal or putamen or posterior fossa or hemispher\$) adj5  
215 (h?emorrhag\$ or h?ematoma\$ or bleed\$)).tw.

216 3. ((h?emorrhag\$ or bleed\$) adj5 (stroke or apoplex\$)).tw.

217 4. (ICH or ICHs).tw.

218 5. 1 or 2 or 3 or 4

219 6. exp anticoagulants/

220 7. exp Vitamin K/ai or thrombin/ai or factor Xa/ai or exp Blood coagulation factors/ai

221 8. exp antithrombins/ or hirudin therapy/

222 9. (anticoagul\$ or antithromb\$).tw.

223 10. (Vitamin K antagonist\$ or VKA or VKAs).tw.

224 11. (direct\$ adj3 thrombin adj3 inhib\$).tw.

225 12. DTI\$1.tw.

226 13. ((factor Xa or factor 10a or fXa or autoprothrombin c or thrombokinas) adj3 inhib\$).tw.

227 14. (activated adj3 (factor X or factor 10) adj3 inhib\$).tw.

228 15. (acenocoumarol\$ or dicoumarol\$ or ethyl biscoumacetate\$ or phenprocoumon\$ or warfarin\$ or ancrod\$ or citric  
229 acid\$ or coumarin\$ or chromonar\$ or coumestro\$ or esculi\$ or ochratoxin\$ or umbelliferone\$ or dermatan sulfate\$ or

230 dextran\$ or edetic acid\$ or enoxaparin\$ or gabexate\$ or heparin\$ or lmwh\$ or nadroparin\$ or pentosan sulfuric  
231 polyester\$ or phenindione\$ or protein c or protein s or tedelparin\$).tw,nm.  
232 16. (tinzaparin or parnaparin or dalteparin or reviparin or danaparoid or lomoparan or org 10172 or mesoglycan or  
233 polysaccharide sulphate\$ or sp54 or sp-54 or md805 or md-805 or cy222 or cy-222 or cy216 or cy-216).tw,nm.  
234 17. (Marevan or Fragmin\$ or Fraxiparin\$ or Klexane).tw,nm.  
235 18. (argatroban or MD805 or MD-805 or dabigatran or ximelagatran or melagatran or efegatran or flovagatran or  
236 inogatran or napsagatran or bivalirudin or lepirudin or hirudin\$ or desirudin or desulfatohirudin or hirugen or hirulog or  
237 AZD0837 or bothrojaracin or odiparcil).tw,nm.  
238 19. (xabans or antistasin or apixaban or betrixaban or du 176b or eribaxaban or fondaparinux or idraparinux or  
239 otamixaban or razaxaban or rivaroxaban or yagin or ym 150 or ym150 or LY517717).tw,nm.  
240 20. exp platelet aggregation inhibitors/ or exp platelet glycoprotein gpiib-iiia complex/ai  
241 21. (antiplatelet\$ or anti-platelet\$ or antiaggreg\$ or anti-aggreg\$ or (platelet\$ adj3 inhibit\$) or (thrombocyt\$ adj3  
242 inhibit\$)).tw.  
243 22. (alprostadi\$ or aspirin\$ or acetylsalicylic acid or acetyl salicylic acid\$ or acetyl?salicylic acid or epoprostenol\$ or  
244 ketanserine\$ or ketorolac tromethamine\$ or milrinone\$ or mopidamol\$ or procainamide\$ or thiophen\$ or trapidil\$ or  
245 picotamide\$ or ligustrazine\$ or levamisole\$ or suloctidil\$ or ozagrel\$ or oky046 or oky-046 or defibrotide\$ or cilostazol  
246 or satigrel or sarpolgrate or kbt3022 or kbt-3022 or isbogrel or cv4151 or cv-4151 or ((glycoprotein iib\$ or gp iib\$)  
247 adj5 (antagonist\$ or inhibitor\$)) or GR144053 or GR-144053 or triflusal).tw,nm.  
248 23. (Beraprost or Cicaprost or Cilostazol or Clopidogrel or Dipyridamole or Iloprost or Indobufen or Lepirudin or  
249 Pentosan Polysulfate or Pentoxifylline or Piracetam or Prostacyclin or Sulfinpyrazone or Sulphinpyrazone or Ticlopidine  
250 or Triflusal or Abciximab or Disintegrin or Echistatin or Eptifibatide or Lamifiban or Orbofiban or Roxifiban or  
251 Sibrafiban or Tirofiban or Xemilofiban or terutroban or picotamide or prasugrel).tw,nm.  
252 24. (Dispril or Albyl\$ or Ticlid\$ or Persantin\$ or Plavix or ReoPro or Integrilin\$ or Aggrastat).tw,nm.  
253 25. or/6-24  
254 26. Randomized Controlled Trials as Topic/  
255 27. random allocation/  
256 28. Controlled Clinical Trials as Topic/  
257 29. control groups/  
258 30. clinical trials as topic/ or clinical trials, phase i as topic/ or clinical trials, phase ii as topic/ or clinical trials, phase iii  
259 as topic/ or clinical trials, phase iv as topic/

- 260 31. double-blind method/  
 261 32. single-blind method/  
 262 33. Placebos/  
 263 34. placebo effect/  
 264 35. randomised controlled trial.pt.  
 265 36. controlled clinical trial.pt.  
 266 37. (clinical trial or clinical trial phase i or clinical trial phase ii or clinical trial phase iii or clinical trial phase iv).pt.  
 267 38. (random\$ or RCT or RCTs).tw.  
 268 39. (controlled adj5 (trial\$ or stud\$)).tw.  
 269 40. (clinical\$ adj5 trial\$).tw.  
 270 41. ((control or treatment or experiment\$ or intervention) adj5 (group\$ or subject\$ or patient\$)).tw.  
 271 42. (quasi-random\$ or quasi random\$ or pseudo-random\$ or pseudo random\$).tw.  
 272 43. ((control or experiment\$ or conservative) adj5 (treatment or therapy or procedure or manage\$)).tw.  
 273 44. ((singl\$ or doubl\$ or tripl\$ or trebl\$) adj5 (blind\$ or mask\$)).tw.  
 274 45. (placebo\$ or sham).tw.  
 275 46. trial.ti.  
 276 47. (assign\$ or allocat\$).tw.  
 277 48. or/26-47  
 278 49. 5 and 25 and 48  
 279 50. exp animals/ not humans/  
 280 51. 49 not 50  
 281  
 282 **EMBASE (Ovid) search strategy**  
 283 1. anticoagulant agent/ or antivitamin k/ or exp blood clotting inhibitor/ or exp coumarin anticoagulant/ or defibrotide/ or  
 284 dextran sulfate/ or fluindione/ or glycosaminoglycan polysulfate/ or exp heparin derivative/ or lupus anticoagulant/ or  
 285 phenindione/  
 286 2. (anticoagul\$ or antithromb\$).tw.  
 287 3. (Vitamin K antagonist\$ or VKA or VKAs).tw.  
 288 4. (direct\$ adj5 thrombin adj5 inhib\$).tw.  
 289 5. DTIS1.tw.

- 290 6. ((factor Xa or factor 10a or fXa or autoprothrombin c or thrombokinase) adj5 inhib\$).tw.
- 291 7. (activated adj5 (factor X or factor 10) adj5 inhib\$).tw.
- 292 8. (acenocoumarol\$ or dicoumarol\$ or ethyl biscoumacetate\$ or phenprocoumon\$ or warfarin\$ or ancrod\$ or citric acid\$  
293 or coumarin\$ or chromonar\$ or coumestro\$ or esculi\$ or ochratoxin\$ or umbelliferone\$ or dermatan sulfate\$ or dextran\$  
294 or edetic acid\$ or enoxaparin\$ or gabexate\$ or heparin\$ or lmwh\$ or nadroparin\$ or pentosane sulfuric polyester\$ or  
295 phenindione\$ or protein c or protein s or tedelparin\$).tw.
- 296 9. (tinzaparin or parnaparin or dalteparin or reviparin or danaparoid or lomoparan or org 10172 or mesoglycan or  
297 polysaccharide sulphate\$ or sp54 or sp-54 or md805 or md-805 or cy222 or cy-222 or cy216 or cy-216).tw.
- 298 10. (Marevan or Fragmin\$ or Fraxiparin\$ or Klexane).tw.
- 299 11. (argatroban or MD805 or MD-805 or dabigatran or ximelagatran or melagatran or efegatran or flovagatran or  
300 inogatran or napsagatran or bivalirudin or lepirudin or hirudin\$ or desirudin or desulfatohirudin or hirugen or hirulog or  
301 AZD0837 or bothrojaracin or odiparcil).tw.
- 302 12. (xabans or antistasin or apixaban or betrixaban or du 176b or eribaxaban or fondaparinux or idraparinux or  
303 otamixaban or razaxaban or rivaroxaban or yagin or ym 150 or ym150 or LY517717).tw.
- 304 13. or/1-12
- 305 14. exp antithrombocytic agent/
- 306 15. fibrinogen receptor/dt [Drug Therapy]
- 307 16. (antiplatelet\$ or anti-platelet\$ or antiaggreg\$ or anti-aggreg\$ or (platelet\$ adj5 inhibit\$) or (thrombocyt\$ adj5  
308 inhibit\$)).tw.
- 309 17. (alprostadi\$ or aspirin\$ or acetylsalicylic acid or acetyl salicylic acid\$ or acetyl?salicylic acid or eprosteno\$ or  
310 ketanserine\$ or ketorolac tromethamine\$ or milrinone\$ or mopidamol\$ or procainamide\$ or thiophen\$ or trapidil\$ or  
311 picotamide\$ or ligustrazine\$ or levamisole\$ or suloctidil\$ or ozagrel\$ or oky046 or oky-046 or defibrotide\$ or cilostazol  
312 or satigrel or sarpolgrelate or kbt3022 or kbt-3022 or isbogrel or cv4151 or cv-4151 or ((glycoprotein iib\$ or gp iib\$)  
313 adj5 (antagonist\$ or inhibitor\$)) or GR144053 or GR-144053 or triflusal).tw.
- 314 18. (Argatroban or Beraprost or Cicaprost or Cilostazol or Clopidogrel or Dipyridamole or Iloprost or Indobufen or  
315 Lepirudin or Pentosan Polysulfate or Pentoxifylline or Piracetam or Prostacyclin or Sulfinpyrazone or Sulphinpyrazone  
316 or Ticlopidine or Triflusal or Abciximab or Disintegrin or Echistatin or Eptifibatide or Lamifiban or Orbofiban or  
317 Roxifiban or Sibrafiban or Tirofiban or Xemilofiban or terutroban or picotamide or prasugrel).tw.
- 318 19. (Dispril or Albyl\$ or Ticlid\$ or Persantin\$ or Plavix or ReoPro or Integrilin\$ or Aggrastat).tw.
- 319 20. or/14-19

320 21. 13 or 20

321 22. \*basal ganglion hemorrhage/ or \*brain hemorrhage/ or \*brain ventricle hemorrhage/ or \*cerebellum hemorrhage/

322 23. ((brain\$ or cerebr\$ or cerebell\$ or intracerebral or intracran\$ or parenchymal or intraparenchymal or intraventricular

323 or infratentorial or supratentorial or basal gangli\$ or putaminal or putamen or posterior fossa or hemispher\$ or stroke or

324 apoplex\$) adj5 (h?emorrhag\$ or h?ematoma\$ or bleed\$)).ti.

325 24. 22 or 23 or (ICH or ICHs).ti.

326 25. randomized controlled trial/ or "randomized controlled trial (topic)"/

327 26. Randomization/

328 27. Controlled Study/

329 28. control group/

330 29. clinical trial/ or phase 1 clinical trial/ or phase 2 clinical trial/ or phase 3 clinical trial/ or phase 4 clinical trial/ or

331 controlled clinical trial/

332 30. Double Blind Procedure/

333 31. Single Blind Procedure/ or triple blind procedure/

334 32. placebo/

335 33. drug comparison/ or drug dose comparison/

336 34. "types of study"/

337 35. random\$.tw.

338 36. (controlled adj5 (trial\$ or stud\$)).tw.

339 37. (clinical\$ adj5 trial\$).tw.

340 38. ((control or treatment or experiment\$ or intervention or surgical) adj5 (group\$ or subject\$ or patient\$)).tw.

341 39. (quasi-random\$ or quasi random\$ or pseudo-random\$ or pseudo random\$).tw.

342 40. ((singl\$ or doubl\$ or tripl\$ or trebl\$) adj5 (blind\$ or mask\$)).tw.

343 41. placebo\$.tw.

344 42. controls.tw.

345 43. or/25-42

346 44. meta analysis/ or "meta analysis (topic)"/ or "systematic review"/ or "systematic review (topic)"/

347 45. meta analy\$.tw.

348 46. metaanaly\$.tw.

349 47. (systematic adj (review\$1 or overview\$1)).tw.

350 48. literature/  
351 49. (cochrane or embase or psychlit or psyclit or psychinfo or psycinfo or cinahl or cinhal or science citation index or  
352 bids or medline or pubmed).ab.  
353 50. (reference list\$ or bibliograph\$ or hand-search\$ or relevant journals or manual search).ab.  
354 51. (selection criteria or data extraction).ab.  
355 52. review.pt. or literature/ or review/  
356 53. 51 and 52  
357 54. 44 or 45 or 46 or 47 or 48 or 49 or 50 or 53  
358 55. (letter or editorial).pt.  
359 56. 54 not 55  
360 57. 43 or 56  
361 58. 21 and 24 and 57  
362 59. limit 58 to human  
363  
364 **Trials register search strategies**  
365  
366 **1. US National Institutes of Health Ongoing Trials Register (ClinicalTrials.gov)**  
367 'Randomised' AND 'intracerebral haemorrhage'  
368  
369 **2. World Health Organization (WHO) International Clinical Trials Registry Platform (ICTRP)**  
370 **(apps.who.int/trialsearch)**  
371 'Intracerebral haemorrhage' OR 'Intracerebral hemorrhage' OR 'ICH'  
372  
373 **3. ISRCTN Registry (www.isrctn.com)**  
374 'Intracerebral haemorrhage' OR 'Intracerebral hemorrhage' OR 'ICH'  
375  
376 **4. Stroke Trials Registry – the Internet Stroke Center (www.strokecenter.org/trials/)**  
377 'Intracerebral haemorrhage' OR 'Intracerebral hemorrhage' OR 'ICH'

378 **External assessment of a random sample of internally assessed outcome events**

379 RESTART's primary sources of outcome event ascertainment were: (1) participant/carer and general practitioner  
380 postal/telephone follow-up questionnaires, performed at six or 12 months after randomisation, and annually thereafter  
381 and (2) ad hoc reports of outcome events by local researchers at sites, general practitioners, and participants/carers.  
382 Reports of outcome events that were reported to the Trial Coordinating Centre are added to the trial database by trial  
383 staff. Trial staff reviewed these reports of outcome events, identified duplicate reports, and gathered information to  
384 support the characterisation of each event guided by the *RESTART reported event processing flowchart*): clinical records,  
385 death certificates, autopsy report (if performed), and brain imaging relating to any cerebral outcome events (local  
386 imaging report as well as the original imaging studies, which were independently reviewed by one of the consultant  
387 neuroradiologist members of the RESTART imaging panels). Trial staff redacted information that might identify  
388 participants or their antithrombotic drug use from these sources of information. These redacted documents were  
389 combined with a structured review form (*RESTART reported event processing checklist*) and given to a consultant  
390 neurologist medical assessor (Will Whiteley or Malcolm Macleod) for adjudication. A medical assessor classified the  
391 report of an outcome event as: (a) impossible to adjudicate (in which case trial staff obtained more information to enable  
392 subsequent adjudication), (b) an SAE/SUSAR, (c) a duplicate report of an outcome event, (d) not an outcome event, or  
393 (e) an outcome event (in which case they recorded an outcome event type and date of symptom onset). The outcome  
394 events that were confirmed after internal adjudication (e) were the only events that are used for analysis for reports for  
395 the Data Monitoring Committee and the final trial report. On 23 March 2018, the RESTART data manager (Jonathan  
396 Drever) exported all of the reported outcome events and internally adjudicated outcome events that had been categorised  
397 as the primary outcome in RESTART (recurrent intracerebral haemorrhage [ICH]). After removing duplicates and  
398 removing reports of outcome events that had not been internally adjudicated, he split the remaining events into three  
399 categories:

- 400 1. Reports of recurrent ICH that were not categorised as recurrent ICH after internal adjudication (n=10). We used  
401 all of these for external adjudication.
- 402 2. Reports of events that were not reported as recurrent ICH but were categorised as recurrent ICH after internal  
403 adjudication (n=5). We used all of these for external adjudication.
- 404 3. Reports of recurrent ICH that were categorised as recurrent ICH after internal adjudication (n=25). We took a  
405 random sample of ten of these events for external adjudication.

406 Dr Thomas Gattringer (consultant neurologist at Universitätsklinik für Neurologie, Medical University of Graz, Austria)  
407 was the independent external assessor during his visit to the Centre for Clinical Brain Sciences at the University of



408 Edinburgh in 2018. He reviewed the same information that had been provided to a medical assessor for internal  
409 adjudication, masked to the outcome of internal adjudication, and independently reviewed and categorised all 25 events  
410 (table overleaf). There was 96% agreement between the internal medical assessor and the external adjudicator on whether  
411 or not the 25 events were recurrent ICH.

| Patient | Event | Reported event type            | Classification by the internal adjudicator | Date of event | Classification by the external adjudicator         | Agreement |
|---------|-------|--------------------------------|--------------------------------------------|---------------|----------------------------------------------------|-----------|
| 87      | 213   | Other Intracranial Haemorrhage | Recurrent ICH                              | 24/06/2016    | Recurrent ICH                                      | yes       |
| 146     | 121   | Other Intracranial Haemorrhage | Recurrent ICH                              | 29/07/2016    | Recurrent ICH                                      | yes       |
| 12      | 45    | Other Type of Stroke           | Recurrent ICH                              | 18/06/2015    | Recurrent ICH                                      | yes       |
| 153     | 168   | Other Type of Stroke           | Recurrent ICH                              | 17/08/2015    | Recurrent ICH                                      | yes       |
| 156     | 112   | Death                          | Recurrent ICH                              | 01/02/2016    | Death from frailty after index, not recurrent, ICH | no        |
| 56      | 32    | Recurrent ICH                  | Ischaemic Stroke                           | 18/08/2014    | Ischaemic Stroke                                   | yes       |
| 76      | 186   | Recurrent ICH                  | Ischaemic Stroke                           | 02/01/2017    | Ischaemic Stroke                                   | yes       |
| 89      | 42    | Recurrent ICH                  | Not an Outcome Event                       | 13/07/2015    | Epileptic seizures                                 | yes       |
| 89      | 41    | Recurrent ICH                  | Not an Outcome Event                       | 27/09/2015    | Epileptic seizures                                 | yes       |
| 96      | 188   | Recurrent ICH                  | Not an Outcome Event                       | 28/11/2017    | Fall at home                                       | yes       |
| 126     | 22    | Recurrent ICH                  | Not an Outcome Event                       | 02/02/2015    | ICH before randomisation                           | yes       |
| 290     | 138   | Recurrent ICH                  | Not an Outcome Event                       | 18/04/2016    | Death due to pre-randomisation ICH                 | yes       |
| 56      | 31    | Recurrent ICH                  | Other Intracranial Haemorrhage             | 19/08/2014    | Haemorrhagic transformation of ischaemic stroke    | yes       |
| 370     | 171   | Recurrent ICH                  | Other Intracranial Haemorrhage             | 27/01/2017    | Convexity SAH                                      | yes       |
| 452     | 192   | Recurrent ICH                  | Other Intracranial Haemorrhage             | 31/10/2017    | Convexity SAH                                      | yes       |
| 26      | 11    | Recurrent ICH                  | Recurrent ICH                              | 16/01/2015    | recurrent ICH                                      | yes       |
| 79      | 149   | Recurrent ICH                  | Recurrent ICH                              | 22/09/2015    | Recurrent ICH                                      | yes       |
| 117     | 124   | Recurrent ICH                  | Recurrent ICH                              | 04/09/2015    | Recurrent ICH                                      | yes       |
| 124     | 76    | Recurrent ICH                  | Recurrent ICH                              | 28/03/2016    | Recurrent ICH                                      | yes       |
| 126     | 17    | Recurrent ICH                  | Recurrent ICH                              | 15/02/2015    | Recurrent ICH                                      | yes       |
| 126     | 51    | Recurrent ICH                  | Recurrent ICH                              | 17/04/2015    | Recurrent ICH                                      | yes       |
| 153     | 169   | Recurrent ICH                  | Recurrent ICH                              | 04/09/2015    | Recurrent ICH                                      | yes       |
| 189     | 67    | Recurrent ICH                  | Recurrent ICH                              | 31/12/2015    | Recurrent ICH                                      | yes       |
| 196     | 68    | Recurrent ICH                  | Recurrent ICH                              | 18/11/2015    | Recurrent ICH                                      | yes       |
| 336     | 177   | Recurrent ICH                  | Recurrent ICH                              | 14/11/2016    | Recurrent ICH                                      | yes       |

412 ICH = intracerebral haemorrhage; SAH = subarachnoid haemorrhage

**Participant characteristics at randomisation by treatment allocation**

|                                                                       | <b>Start antiplatelet therapy (n=268)</b> |       | <b>Avoid antiplatelet therapy (n=269)</b> |       |
|-----------------------------------------------------------------------|-------------------------------------------|-------|-------------------------------------------|-------|
| <b>Occlusive vascular diseases before intracerebral haemorrhage *</b> |                                           |       |                                           |       |
| Ischaemic heart disease                                               | 133                                       | (50%) | 110                                       | (41%) |
| Ischaemic stroke                                                      | 75                                        | (28%) | 88                                        | (33%) |
| Transient ischaemic attack                                            | 57                                        | (21%) | 76                                        | (28%) |
| Atrial fibrillation/flutter                                           | 42                                        | (16%) | 50                                        | (19%) |
| Peripheral arterial disease                                           | 22                                        | (8%)  | 14                                        | (5%)  |
| Valvular heart disease                                                | 11                                        | (4%)  | 18                                        | (7%)  |
| Symptomatic venous thromboembolism                                    | 9                                         | (3%)  | 10                                        | (4%)  |
| Stroke of uncertain pathological type                                 | 2                                         | (<1%) | 3                                         | (1%)  |
| Retinal artery occlusion                                              | 3                                         | (<1%) | 5                                         | (2%)  |
| Mesenteric ischaemia                                                  | 1                                         | (<1%) | 1                                         | (<1%) |
| <b>Past history of haemorrhage before intracerebral haemorrhage</b>   |                                           |       |                                           |       |
| Intracerebral haemorrhage                                             | 8                                         | (3%)  | 11                                        | (4%)  |
| Gastrointestinal haemorrhage                                          | 7                                         | (3%)  | 6                                         | (2%)  |
| Other type of intracranial haemorrhage                                | 5                                         | (2%)  | 6                                         | (2%)  |
| Other type of extracranial haemorrhage                                | 3                                         | (1%)  | 2                                         | (1%)  |
| <b>Other relevant co-morbidities before intracerebral haemorrhage</b> |                                           |       |                                           |       |
| High blood pressure                                                   | 194                                       | (72%) | 207                                       | (77%) |
| Diabetes mellitus                                                     | 57                                        | (21%) | 70                                        | (26%) |
| Congestive cardiac failure                                            | 12                                        | (5%)  | 8                                         | (3%)  |
| Renal failure on dialysis                                             | 3                                         | (1%)  | 3                                         | (1%)  |
| <b>Functional status<sup>1</sup></b>                                  |                                           |       |                                           |       |
| Able to lift both arms off the bed                                    | 242                                       | (90%) | 244                                       | (91%) |
| Able to walk without the help of another person                       | 199                                       | (74%) | 196                                       | (73%) |
| Able to talk and not confused                                         | 234                                       | (87%) | 238                                       | (89%) |

414 Data are n (%). \* Some participants had more than one co-morbidity.

415 **Antithrombotic therapy before randomisation and during follow-up**

|                                                                                                             | <b>Start antiplatelet therapy (n=268)</b> |       | <b>Avoid antiplatelet therapy (n=269)</b> |       |
|-------------------------------------------------------------------------------------------------------------|-------------------------------------------|-------|-------------------------------------------|-------|
| <b>Antithrombotic therapy used before intracerebral haemorrhage</b>                                         |                                           |       |                                           |       |
| Antiplatelet therapy                                                                                        |                                           |       |                                           |       |
| Aspirin monotherapy                                                                                         | 132                                       | (49%) | 137                                       | (51%) |
| Clopidogrel monotherapy                                                                                     | 70                                        | (26%) | 63                                        | (23%) |
| Aspirin and Clopidogrel                                                                                     | 9                                         | (3%)  | 5                                         | (2%)  |
| Aspirin and Dipyridamole                                                                                    | 6                                         | (2%)  | 5                                         | (2%)  |
| Other                                                                                                       | 4                                         | (1%)  | 2                                         | (1%)  |
| Anticoagulant therapy                                                                                       |                                           |       |                                           |       |
| Vitamin K antagonist                                                                                        | 30                                        | (11%) | 41                                        | (15%) |
| Non-vitamin K antagonist                                                                                    | 8                                         | (3%)  | 11                                        | (4%)  |
| Antiplatelet and anticoagulant therapy                                                                      | 9                                         | (3%)  | 5                                         | (2%)  |
| <b>Preferred antiplatelet therapy that would be prescribed if allocated to start antiplatelet therapy *</b> |                                           |       |                                           |       |
| Aspirin monotherapy                                                                                         | 149                                       | (56%) | 150                                       | (56%) |
| Clopidogrel monotherapy                                                                                     | 117                                       | (44%) | 112                                       | (42%) |
| Aspirin and Clopidogrel                                                                                     | 1                                         | (<1%) | 5                                         | (2%)  |
| Dipyridamole monotherapy                                                                                    | 1                                         | (<1%) | 1                                         | (<1%) |
| Aspirin, Clopidogrel and Dipyridamole                                                                       | 0                                         | (0%)  | 1                                         | (<1%) |
| <b>Adherence to allocated treatment strategy before the first outcome event after randomisation §</b>       |                                           |       |                                           |       |
| Hospital/clinic discharge                                                                                   | 259/265                                   | (98%) | 266/266                                   | (99%) |
| First annual follow-up                                                                                      | 193/218                                   | (89%) | 205/211                                   | (97%) |
| Second annual follow-up                                                                                     | 104/122                                   | (85%) | 105/113                                   | (93%) |
| Third annual follow-up                                                                                      | 59/71                                     | (83%) | 61/69                                     | (88%) |
| Fourth annual follow-up                                                                                     | 21/26                                     | (81%) | 20/24                                     | (83%) |

416 \* Variable used in the minimisation algorithm. § Denominators indicate the number of participants surviving at each  
 417 follow-up timepoint without a preceding outcome event

418 **Anticoagulant therapy at discharge and during follow-up**

|                           | <b>Start antiplatelet therapy (n=268)</b> |       | <b>Avoid antiplatelet therapy (n=269)</b> |       |
|---------------------------|-------------------------------------------|-------|-------------------------------------------|-------|
| Hospital/clinic discharge | 1/268                                     | (<1%) | 1/269                                     | (<1%) |
| First annual follow-up    | 8/265                                     | (3%)  | 6/267                                     | (2%)  |
| Second annual follow-up   | 6/165                                     | (4%)  | 5/161                                     | (3%)  |
| Third annual follow-up    | 9/103                                     | (9%)  | 3/107                                     | (3%)  |
| Fourth annual follow-up   | 4/42                                      | (10%) | 1/39                                      | (3%)  |

419 Denominators indicate the number of participants surviving at each follow-up timepoint

420  
421

**Blood pressure-lowering drug use at discharge and during follow-up, with average achieved blood pressures during follow-up, by treatment allocation**

|                                       | Start antiplatelet therapy |           | Avoid antiplatelet therapy |           |
|---------------------------------------|----------------------------|-----------|----------------------------|-----------|
| Hospital/clinic discharge             | n=268                      |           | n=269                      |           |
| None                                  | 53                         | (20%)     | 41                         | (15%)     |
| One                                   | 82                         | (31%)     | 92                         | (34%)     |
| Two                                   | 92                         | (34%)     | 84                         | (31%)     |
| Three                                 | 30                         | (11%)     | 36                         | (13%)     |
| Four or more                          | 11                         | (4%)      | 16                         | (6%)      |
| First annual follow-up                | n=265                      |           | n=267                      |           |
| Median systolic blood pressure, mmHg  | 132                        | (120-140) | 130                        | (121-140) |
| Median diastolic blood pressure, mmHg | 74                         | (70-80)   | 74                         | (69-80)   |
| None                                  | 46                         | (17%)     | 34                         | (13%)     |
| One                                   | 54                         | (20%)     | 78                         | (29%)     |
| Two                                   | 85                         | (32%)     | 75                         | (28%)     |
| Three                                 | 56                         | (21%)     | 50                         | (19%)     |
| Four or more                          | 24                         | (9%)      | 30                         | (11%)     |
| Second annual follow-up               | n=165                      |           | n=161                      |           |
| Median systolic blood pressure, mmHg  | 129                        | (120-138) | 130                        | (120-140) |
| Median diastolic blood pressure, mmHg | 72                         | (66-80)   | 72                         | (67-80)   |
| None                                  | 29                         | (18%)     | 27                         | (17%)     |
| One                                   | 39                         | (24%)     | 34                         | (21%)     |
| Two                                   | 41                         | (25%)     | 48                         | (30%)     |
| Three                                 | 34                         | (21%)     | 33                         | (21%)     |
| Four or more                          | 10                         | (10%)     | 11                         | (10%)     |
| Third annual follow-up                | n=103                      |           | n=107                      |           |
| Median systolic blood pressure, mmHg  | 133                        | (120-141) | 131                        | (120-140) |
| Median diastolic blood pressure, mmHg | 76                         | (70-82)   | 72                         | (68-80)   |
| None                                  | 22                         | (21%)     | 21                         | (20%)     |
| One                                   | 25                         | (24%)     | 19                         | (18%)     |
| Two                                   | 23                         | (22%)     | 31                         | (29%)     |
| Three                                 | 23                         | (22%)     | 25                         | (23%)     |
| Four or more                          | 10                         | (10%)     | 11                         | (10%)     |
| Fourth annual follow-up               | n=42                       |           | n=39                       |           |
| Median systolic blood pressure, mmHg  | 132                        | (120-140) | 129                        | (120-139) |
| Median diastolic blood pressure, mmHg | 72                         | (62-80)   | 74                         | (63-80)   |
| None                                  | 9                          | (21%)     | 3                          | (8%)      |
| One                                   | 11                         | (26%)     | 11                         | (28%)     |
| Two                                   | 15                         | (36%)     | 9                          | (23%)     |
| Three                                 | 7                          | (17%)     | 12                         | (31%)     |
| Four or more                          | 0                          | (0%)      | 4                          | (10%)     |

422 Data are n (%) or median (inter-quartile range).

**Cumulative absolute risks, and risk differences, of the primary outcome and key secondary outcomes, by treatment allocation and by year**

|                                                                                                                                                                                                                                                                | Start antiplatelet therapy (n=268) |                | Avoid antiplatelet therapy (n=268) |                | Risk difference |                 |
|----------------------------------------------------------------------------------------------------------------------------------------------------------------------------------------------------------------------------------------------------------------|------------------------------------|----------------|------------------------------------|----------------|-----------------|-----------------|
| Recurrent symptomatic spontaneous intracerebral haemorrhage                                                                                                                                                                                                    |                                    |                |                                    |                |                 |                 |
| Year 1                                                                                                                                                                                                                                                         | 3.1                                | (1.6 to 6.2)   | 7.3                                | (4.6 to 11.4)  | -4.2            | (-8.1 to -0.3)  |
| Year 2                                                                                                                                                                                                                                                         | 5.5                                | (3.1 to 9.7)   | 10.3                               | (6.9 to 15.2)  | -4.8            | (-9.9 to 0.4)   |
| Year 3                                                                                                                                                                                                                                                         | 5.5                                | (3.1 to 9.7)   | 10.3                               | (6.9 to 15.2)  | -4.8            | (-9.9 to 0.4)   |
| Year 4                                                                                                                                                                                                                                                         | 5.5                                | (3.1 to 9.7)   | 10.3                               | (6.9 to 15.2)  | -4.8            | (-9.9 to 0.4)   |
| All major haemorrhagic events (all types of symptomatic spontaneous or traumatic intracranial haemorrhage, or symptomatic major extracranial haemorrhage)                                                                                                      |                                    |                |                                    |                |                 |                 |
| Year 1                                                                                                                                                                                                                                                         | 5.2                                | (3.0 to 8.8)   | 8.0                                | (5.3 to 12.2)  | -2.9            | (-7.2 to 1.5)   |
| Year 2                                                                                                                                                                                                                                                         | 7.6                                | (4.7 to 12.0)  | 11.0                               | (7.5 to 16.0)  | -3.5            | (-8.9 to 2.0)   |
| Year 3                                                                                                                                                                                                                                                         | 7.6                                | (4.7 to 12.0)  | 11.0                               | (7.5 to 16.0)  | -3.5            | (-8.9 to 2.0)   |
| Year 4                                                                                                                                                                                                                                                         | 7.6                                | (4.7 to 12.0)  | 11.0                               | (7.5 to 16.0)  | -3.5            | (-8.9 to 2.0)   |
| All major occlusive vascular events (symptomatic ischaemic stroke, myocardial infarction, mesenteric ischaemia, peripheral arterial occlusion, deep vein thrombosis, pulmonary embolism, or carotid/coronary/peripheral arterial revascularisation procedures) |                                    |                |                                    |                |                 |                 |
| Year 1                                                                                                                                                                                                                                                         | 7.6                                | (4.9 to 11.8)  | 9.6                                | (6.6 to 14.1)  | -2.0            | (-7.1 to 3.0)   |
| Year 2                                                                                                                                                                                                                                                         | 14.2                               | (10.0 to 20.0) | 14.0                               | (9.9 to 19.5)  | 0.2             | (-6.6 to 7.1)   |
| Year 3                                                                                                                                                                                                                                                         | 19.0                               | (13.6 to 26.1) | 19.2                               | (13.7 to 26.4) | -0.2            | (-9.0 to 8.6)   |
| Year 4                                                                                                                                                                                                                                                         | 30.9                               | (21.3 to 43.4) | 23.9                               | (16.4 to 33.9) | 7.0             | (-7.0 to 21.0)  |
| All major haemorrhagic or occlusive vascular events                                                                                                                                                                                                            |                                    |                |                                    |                |                 |                 |
| Year 1                                                                                                                                                                                                                                                         | 12.7                               | (9.1 to 17.6)  | 17.1                               | (12.9 to 22.4) | -4.4            | (-10.7 to 1.9)  |
| Year 2                                                                                                                                                                                                                                                         | 21.4                               | (16.3 to 27.7) | 23.7                               | (18.5 to 30.0) | -2.3            | (-10.3 to 5.7)  |
| Year 3                                                                                                                                                                                                                                                         | 24.0                               | (18.5 to 30.9) | 28.6                               | (22.4 to 36.0) | -4.6            | (-13.7 to 4.6)  |
| Year 4                                                                                                                                                                                                                                                         | 33.1                               | (24.2 to 44.2) | 33.3                               | (25.2 to 43.1) | -0.1            | (-13.6 to 13.3) |
| All major occlusive vascular events (protocol-defined)                                                                                                                                                                                                         |                                    |                |                                    |                |                 |                 |
| Year 1                                                                                                                                                                                                                                                         | 9.5                                | (6.4 to 14.0)  | 14.4                               | (10.6 to 19.6) | -4.9            | (-10.8 to 0.9)  |
| Year 2                                                                                                                                                                                                                                                         | 18.6                               | (13.8 to 24.9) | 20.6                               | (15.7 to 26.8) | -2.0            | (-9.8 to 5.9)   |
| Year 3                                                                                                                                                                                                                                                         | 22.4                               | (16.8 to 29.7) | 25.7                               | (19.7 to 33.3) | -3.3            | (-12.7 to 6.0)  |
| Year 4                                                                                                                                                                                                                                                         | 29.9                               | (21.2 to 41.1) | 30.5                               | (22.5 to 40.6) | -0.6            | (-14.1 to 12.8) |
| All major vascular events (protocol-defined)                                                                                                                                                                                                                   |                                    |                |                                    |                |                 |                 |
| Year 1                                                                                                                                                                                                                                                         | 8.8                                | (5.9 to 13.1)  | 16.7                               | (12.6 to 22.0) | -7.9            | (-13.7 to -2.1) |
| Year 2                                                                                                                                                                                                                                                         | 16.2                               | (11.8 to 22.0) | 25.6                               | (20.2 to 32.1) | -9.3            | (-17.1 to -1.5) |
| Year 3                                                                                                                                                                                                                                                         | 21.5                               | (16.0 to 28.6) | 31.1                               | (24.7 to 38.7) | -9.6            | (-19.0 to -0.2) |
| Year 4                                                                                                                                                                                                                                                         | 30.2                               | (21.6 to 41.1) | 35.5                               | (27.5 to 45.1) | -5.4            | (-18.5 to 7.8)  |

426 **Kaplan-Meier plot showing the risk of the first occurrence of any major haemorrhagic event**

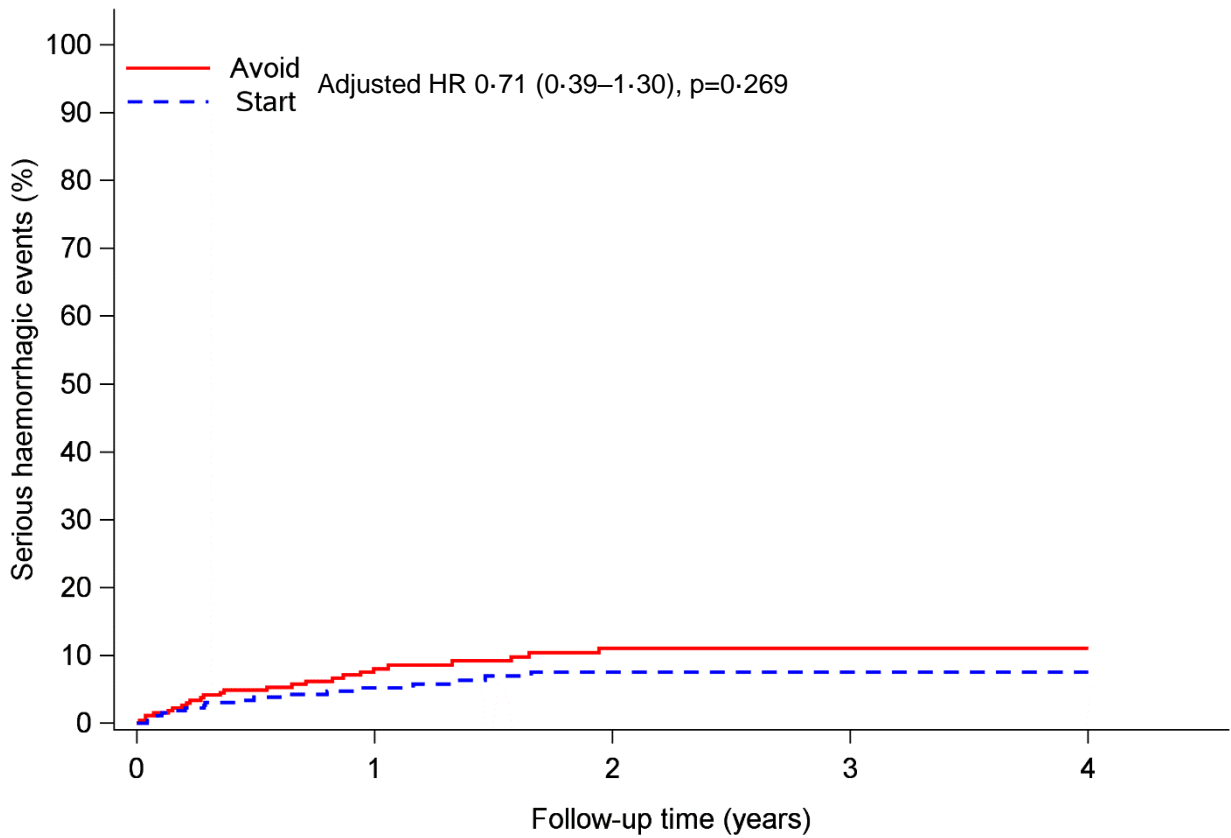

Patients-at-Risk (No. Cumulative Events)

|       |         |          |          |         |         |
|-------|---------|----------|----------|---------|---------|
| Avoid | 268 (0) | 184 (20) | 121 (25) | 73 (25) | 22 (25) |
| Start | 268 (0) | 188 (13) | 120 (17) | 70 (17) | 24 (17) |

427  
428  
429

Numbers below the x-axis indicate numbers of survivors under follow-up at the start of each year (and the cumulative number of participants with a first event in follow-up) according to treatment allocation



430 **Kaplan-Meier plot showing the risk of the first occurrence of any major occlusive vascular event**

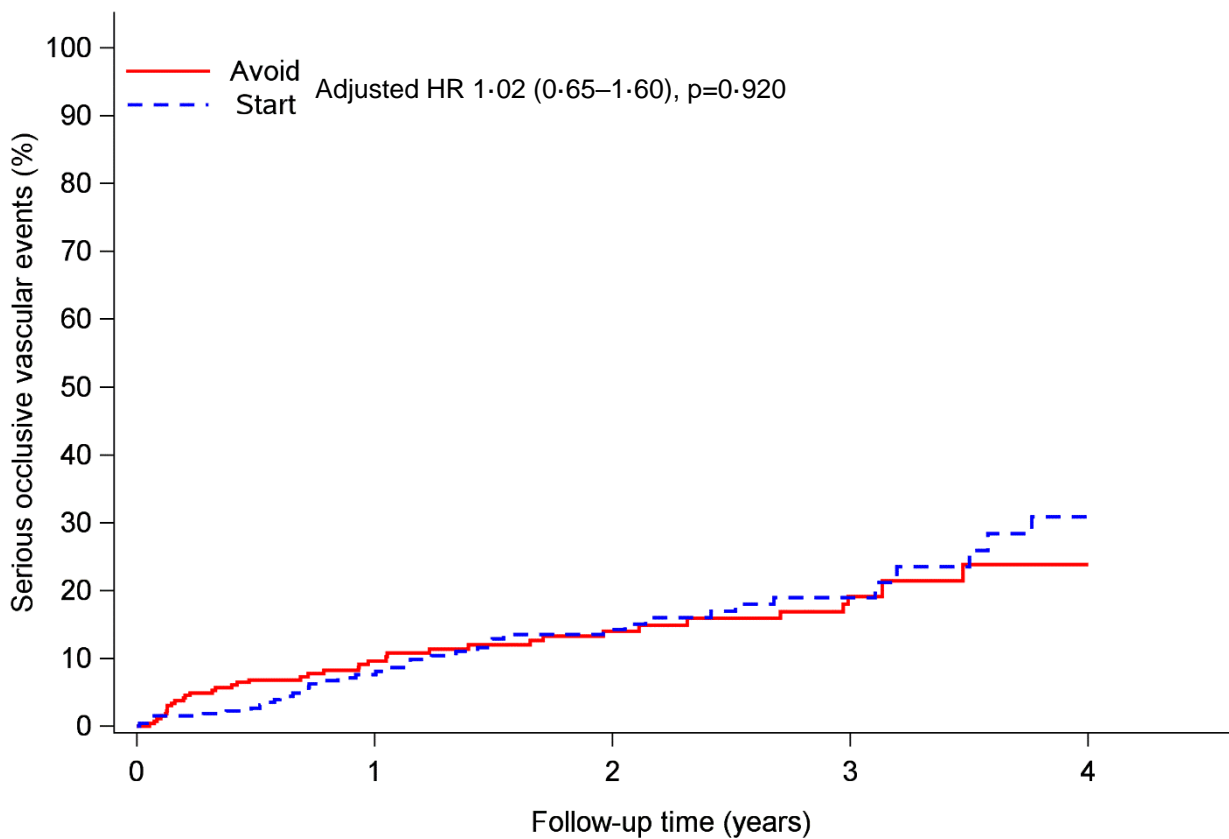

Patients-at-Risk (No. Cumulative Events)

|       |         |          |          |         |         |
|-------|---------|----------|----------|---------|---------|
| Avoid | 268 (0) | 172 (24) | 111 (31) | 66 (36) | 18 (38) |
| Start | 268 (0) | 181 (18) | 111 (29) | 62 (34) | 18 (39) |

431

432

433

Numbers below the x-axis indicate numbers of survivors under follow-up at the start of each year (and the cumulative number of participants with a first event in follow-up) according to treatment allocation

434  
435

**Kaplan-Meier plot showing the risk of the first occurrence of any major haemorrhagic or occlusive vascular event**

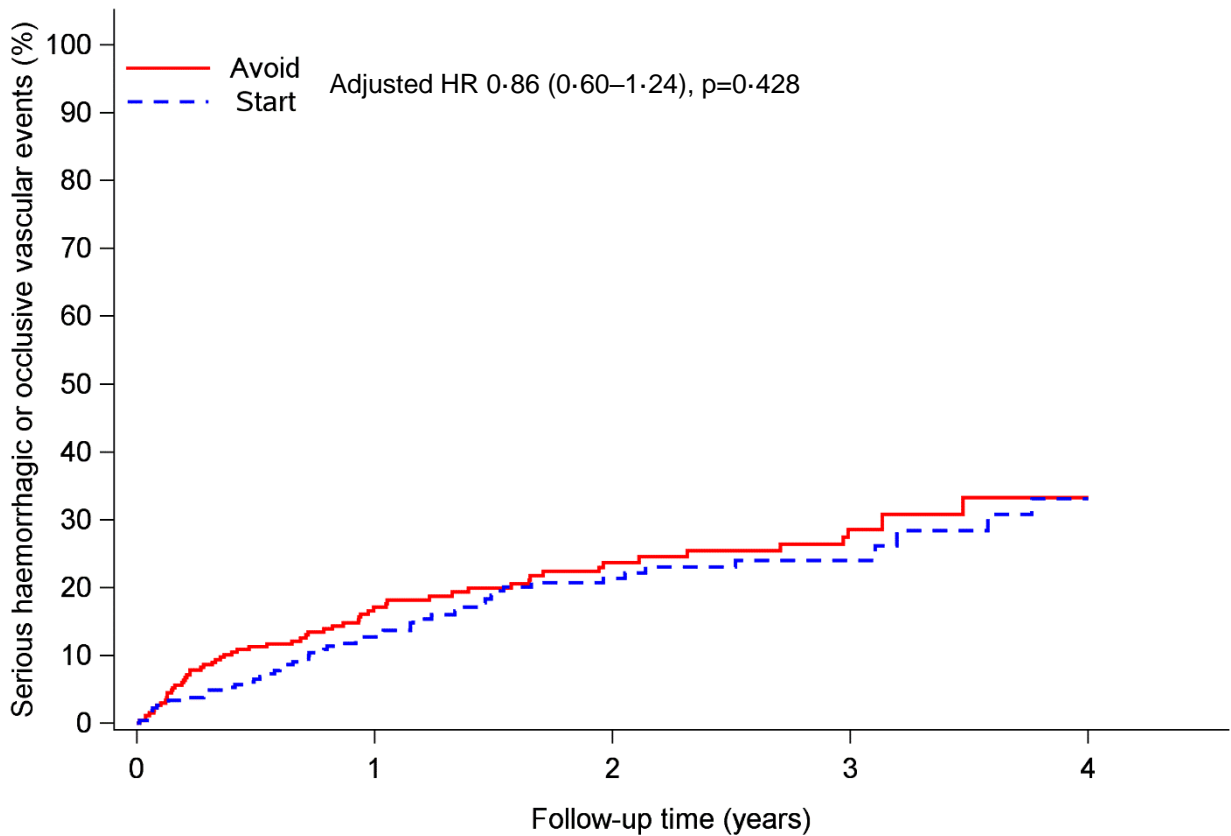

Patients-at-Risk (No. Cumulative Events)

|       | 0       | 1        | 2        | 3       | 4       |
|-------|---------|----------|----------|---------|---------|
| Avoid | 268 (0) | 166 (43) | 103 (54) | 62 (59) | 17 (61) |
| Start | 268 (0) | 177 (31) | 107 (46) | 60 (49) | 18 (53) |

436

437 Numbers below the x-axis indicate numbers of survivors under follow-up at the start of each year (and the cumulative  
438 number of participants with a first event in follow-up) according to treatment allocation

439 **Kaplan-Meier plot showing the risk of the first occurrence of the composite outcome of major vascular events, as**  
 440 **proposed in the trial protocol**  
 441

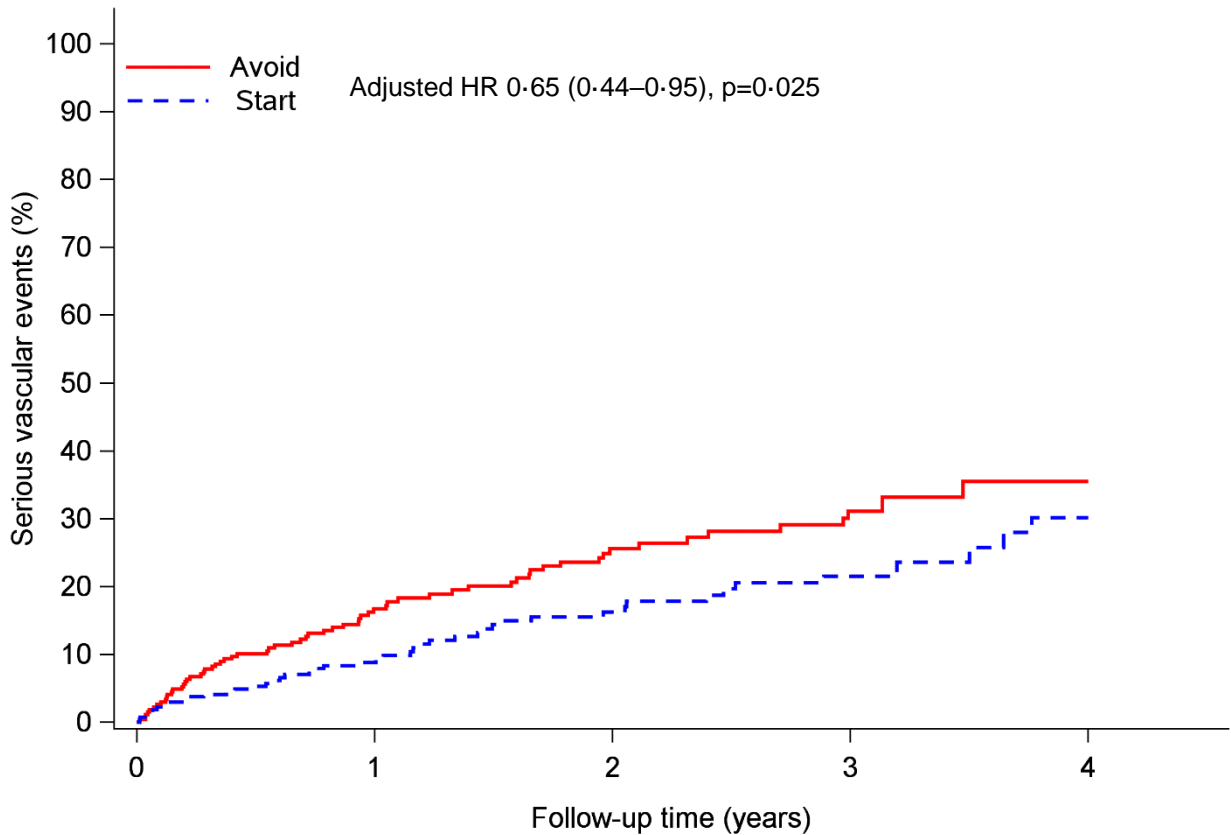

Patients-at-Risk (No. Cumulative Events)

|       |         |          |          |         |         |
|-------|---------|----------|----------|---------|---------|
| Avoid | 268 (0) | 169 (42) | 105 (57) | 63 (63) | 18 (65) |
| Start | 268 (0) | 185 (22) | 115 (35) | 66 (41) | 21 (45) |

442

443 Numbers below the x-axis indicate numbers of survivors under follow-up at the start of each year (and the cumulative  
 444 number of participants with a first event in follow-up) according to treatment allocation

445 **Pre-specified exploratory sub-group analyses of all major haemorrhagic events**

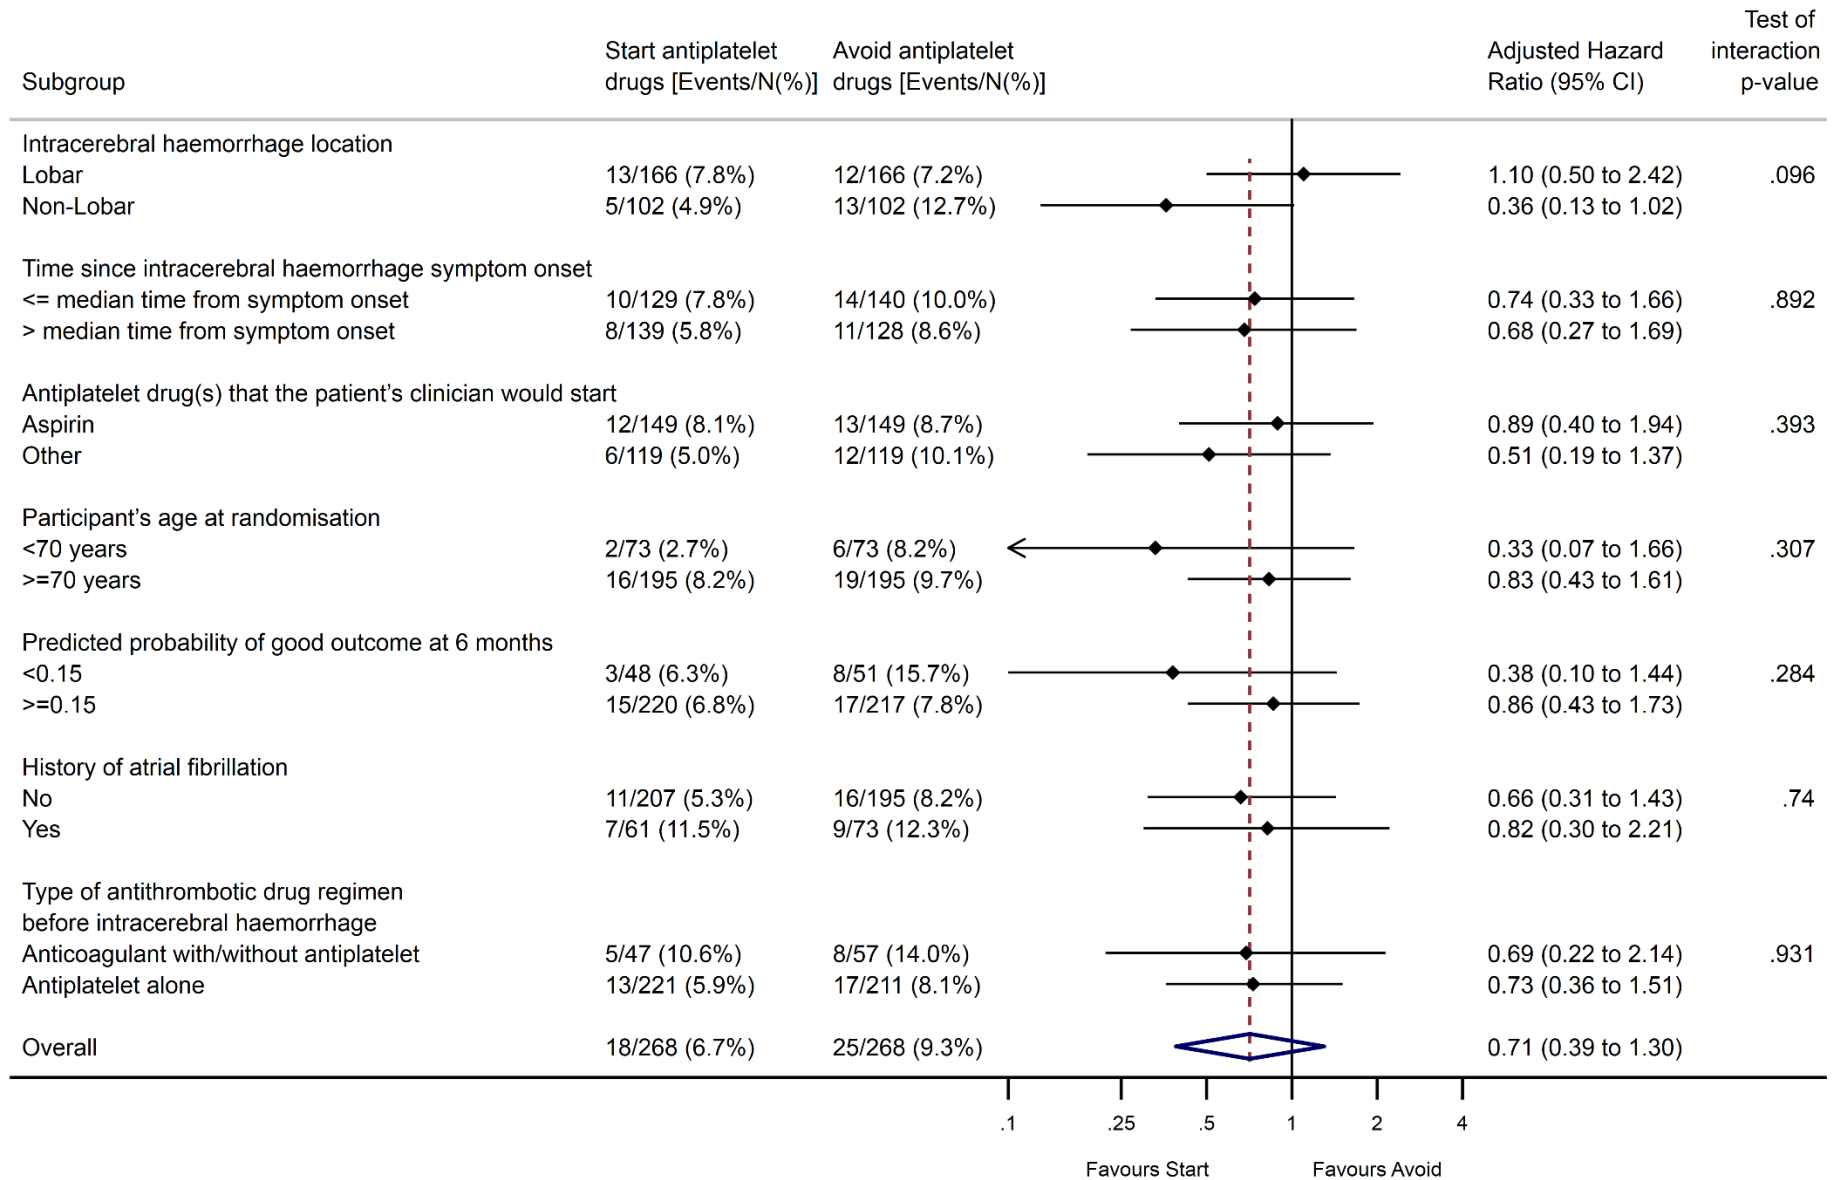

447 Pre-specified exploratory sub-group analyses of all major occlusive vascular events

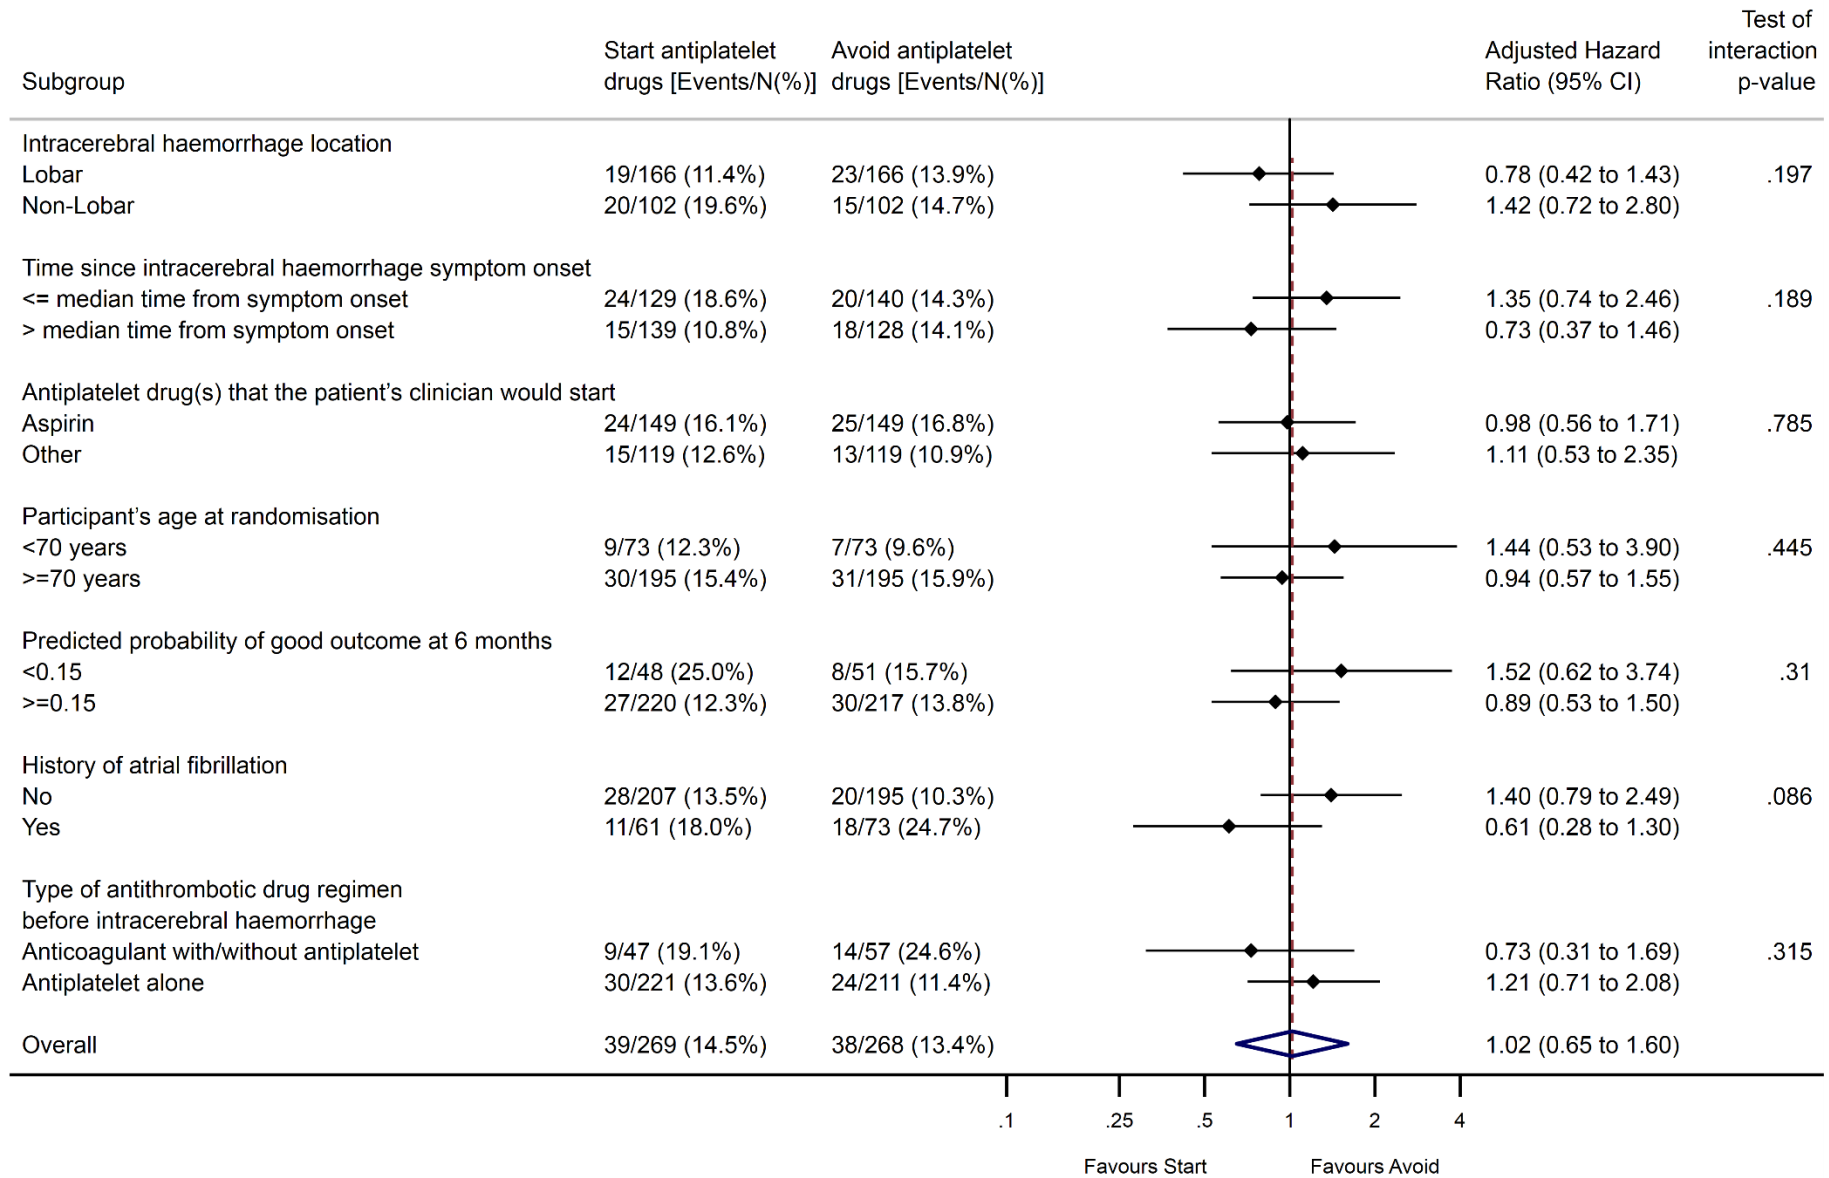

449 Pre-specified exploratory sub-group analyses of the composite outcome of all major haemorrhagic or occlusive vascular events

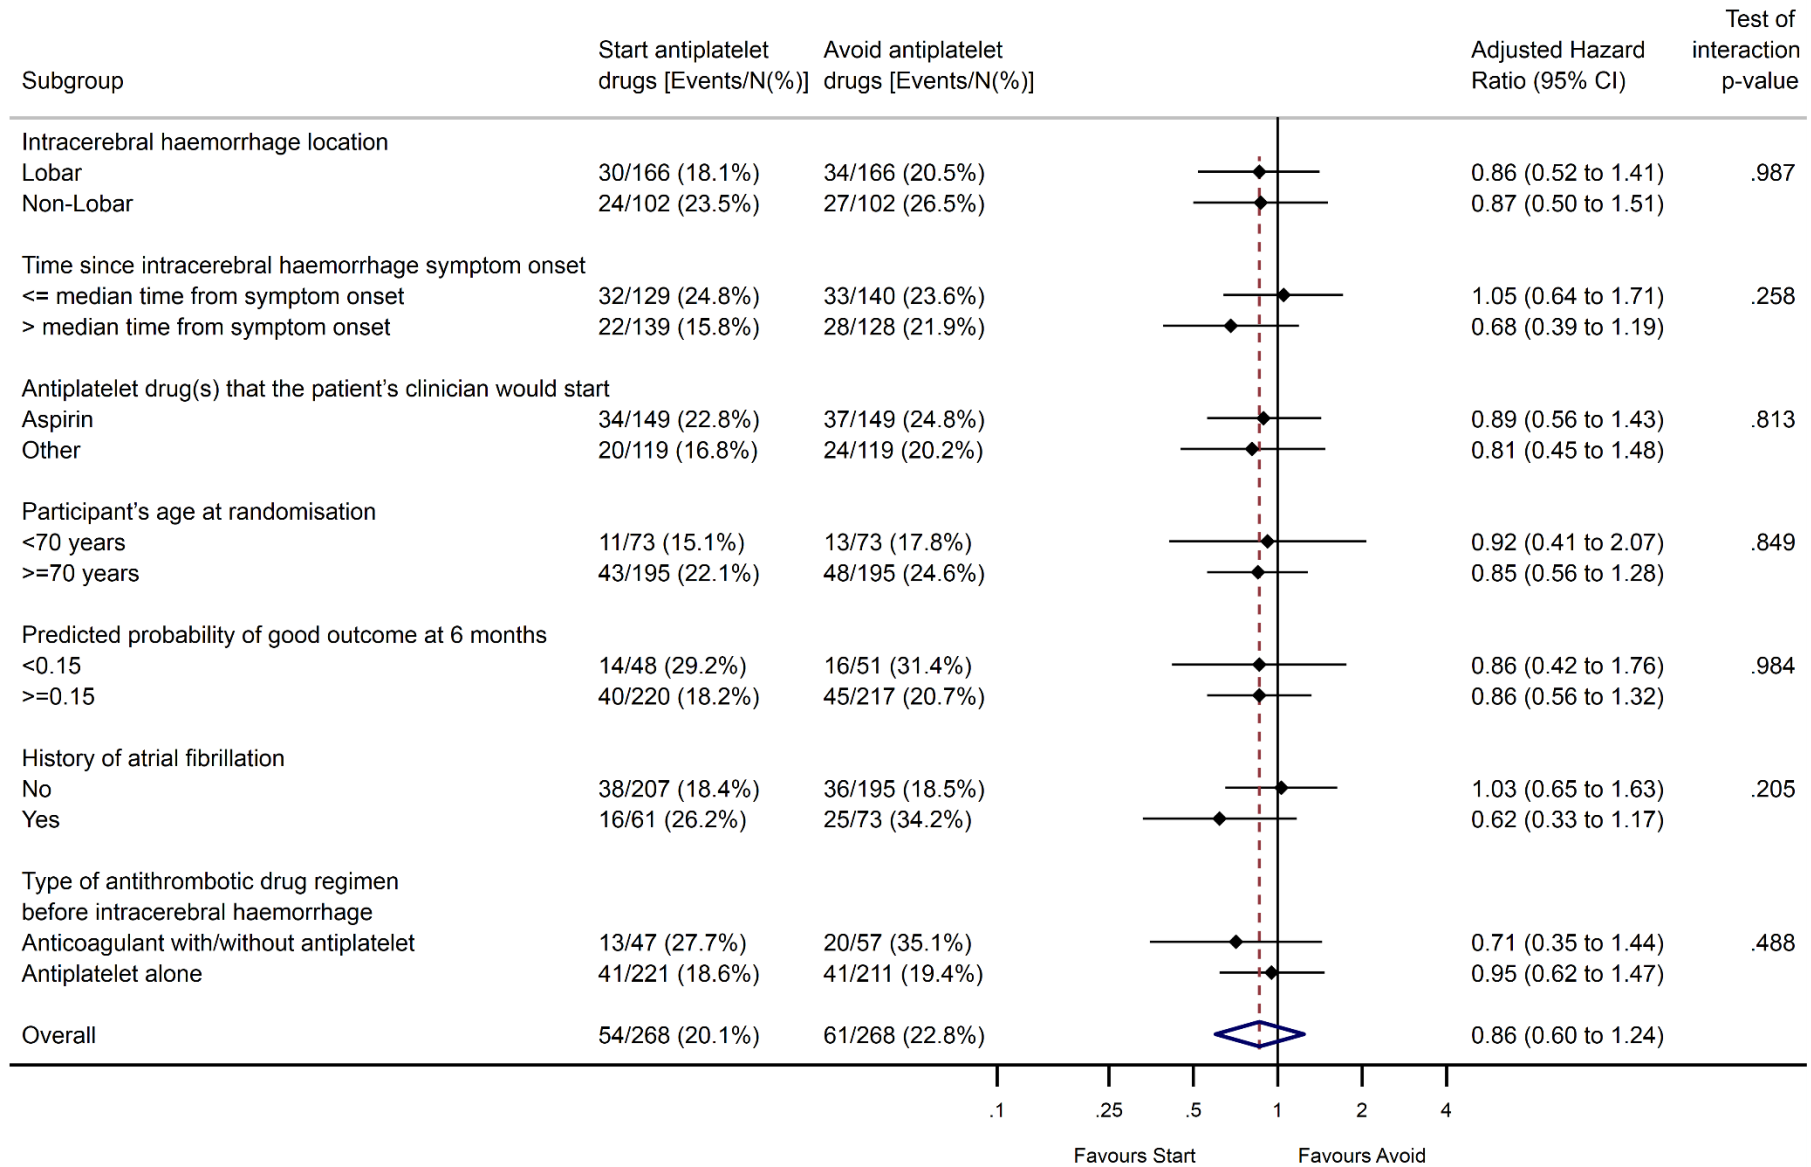

451  
452

**modified Rankin Scale (mRS) scores rated at randomisation by collaborators and during follow-up by participants/carers,<sup>2-4</sup> by treatment allocation**

|                                   | Start antiplatelet therapy |       | Avoid antiplatelet therapy |       |
|-----------------------------------|----------------------------|-------|----------------------------|-------|
| At randomisation                  | n=268                      |       | n=269                      |       |
| 0 (no symptoms)                   | 31                         | (12%) | 26                         | (10%) |
| 1 (no significant disability)     | 66                         | (25%) | 59                         | (22%) |
| 2 (slight disability)             | 47                         | (17%) | 62                         | (23%) |
| 3 (moderate disability)           | 55                         | (21%) | 53                         | (20%) |
| 4 (moderately severe disability)  | 57                         | (21%) | 50                         | (18%) |
| 5 (severe disability)             | 12                         | (4%)  | 19                         | (7%)  |
| First annual follow-up (p=0.920)  | n=230                      |       | n=231                      |       |
| 0 (no symptoms)                   | 34                         | (15%) | 36                         | (16%) |
| 1 (no significant disability)     | 41                         | (18%) | 36                         | (16%) |
| 2 (slight disability)             | 20                         | (9%)  | 28                         | (12%) |
| 3 (moderate disability)           | 75                         | (33%) | 72                         | (31%) |
| 4 (moderately severe disability)  | 21                         | (9%)  | 13                         | (6%)  |
| 5 (severe disability)             | 16                         | (7%)  | 24                         | (10%) |
| 6 (dead)                          | 23                         | (10%) | 22                         | (10%) |
| Second follow-up (p=0.408)        | n=176                      |       | n=178                      |       |
| 0 (no symptoms)                   | 19                         | (11%) | 27                         | (15%) |
| 1 (no significant disability)     | 21                         | (12%) | 22                         | (12%) |
| 2 (slight disability)             | 16                         | (9%)  | 20                         | (11%) |
| 3 (moderate disability)           | 63                         | (36%) | 52                         | (29%) |
| 4 (moderately severe disability)  | 11                         | (6%)  | 8                          | (5%)  |
| 5 (severe disability)             | 15                         | (9%)  | 17                         | (10%) |
| 6 (dead)                          | 31                         | (18%) | 32                         | (18%) |
| Third annual follow-up (p=0.328)  | n=118                      |       | n=121                      |       |
| 0 (no symptoms)                   | 13                         | (11%) | 12                         | (10%) |
| 1 (no significant disability)     | 7                          | (6%)  | 16                         | (13%) |
| 2 (slight disability)             | 11                         | (9%)  | 17                         | (14%) |
| 3 (moderate disability)           | 41                         | (35%) | 31                         | (26%) |
| 4 (moderately severe disability)  | 7                          | (6%)  | 6                          | (5%)  |
| 5 (severe disability)             | 8                          | (7%)  | 10                         | (8%)  |
| 6 (dead)                          | 31                         | (26%) | 29                         | (24%) |
| Fourth annual follow-up (p=0.783) | n=49                       |       | n=48                       |       |
| 0 (no symptoms)                   | 4                          | (8%)  | 5                          | (10%) |
| 1 (no significant disability)     | 4                          | (8%)  | 5                          | (10%) |
| 2 (slight disability)             | 2                          | (4%)  | 4                          | (8%)  |
| 3 (moderate disability)           | 19                         | (38%) | 13                         | (27%) |
| 4 (moderately severe disability)  | 2                          | (4%)  | 1                          | (2%)  |
| 5 (severe disability)             | 4                          | (8%)  | 5                          | (10%) |
| 6 (dead)                          | 15                         | (30%) | 15                         | (31%) |

453  
454  
455

The analysis for each year is restricted to participants who were randomised at least the same number of years before the end of recruitment, to avoid including early deaths in the relevant follow-up year when the corresponding surviving recruits would not have had the potential to be assessed.

**Serious adverse events, classified by organ system**

| <b>MedDRA system organ class</b>                                         | <b>Start antiplatelet therapy (n=268)</b> | <b>Avoid antiplatelet therapy (n=269)</b> |
|--------------------------------------------------------------------------|-------------------------------------------|-------------------------------------------|
| Blood and lymphatic system disorders                                     | n=0                                       | n=0                                       |
| Cardiac disorders                                                        | n=2                                       | n=0                                       |
| Congenital, familial and genetic disorders                               | n=0                                       | n=0                                       |
| Ear and labyrinth disorders                                              | n=0                                       | n=0                                       |
| Endocrine disorders                                                      | n=0                                       | n=0                                       |
| Eye disorders                                                            | n=0                                       | n=0                                       |
| Gastrointestinal disorders                                               | n=0                                       | n=0                                       |
| General disorders and administration site conditions                     | n=0                                       | n=0                                       |
| Hepatobiliary disorders                                                  | n=0                                       | n=1                                       |
| Immune system disorders                                                  | n=0                                       | n=0                                       |
| Infections and infestations                                              | n=0                                       | n=0                                       |
| Injury, poisoning and procedural complications                           | n=1                                       | n=1                                       |
| Investigations                                                           | n=0                                       | n=0                                       |
| Metabolism and nutrition disorders                                       | n=0                                       | n=0                                       |
| Musculoskeletal and connective tissue Disorders                          | n=1                                       | n=1                                       |
| Neoplasms benign, malignant and unspecified (including cysts and polyps) | n=0                                       | n=1                                       |
| Nervous system disorders                                                 | n=1                                       | n=1                                       |
| Pregnancy, puerperium and perinatal Conditions                           | n=0                                       | n=0                                       |
| Psychiatric disorders                                                    | n=0                                       | n=0                                       |
| Renal and urinary disorders                                              | n=0                                       | n=0                                       |
| Reproductive system and breast disorders                                 | n=0                                       | n=0                                       |
| Respiratory, thoracic and mediastinal disorders                          | n=0                                       | n=0                                       |
| Skin and subcutaneous tissue disorders                                   | n=0                                       | n=0                                       |
| Social circumstances                                                     | n=0                                       | n=0                                       |
| Surgical and medical procedures                                          | n=1                                       | n=0                                       |
| Vascular disorders                                                       | n=0                                       | n=0                                       |



458 **References**

- 459 1. Counsell C, Dennis M, McDowall M, Warlow C. Predicting outcome after acute and subacute stroke:  
460 development and validation of new prognostic models. *Stroke* 2002; **33**(4): 1041-7.
- 461 2. Bruno A, Akinwuntan AE, Lin C, et al. Simplified modified rankin scale questionnaire: reproducibility over the  
462 telephone and validation with quality of life. *Stroke* 2011; **42**(8): 2276-9.
- 463 3. Bruno A, Shah N, Lin C, et al. Improving modified Rankin Scale assessment with a simplified questionnaire.  
464 *Stroke* 2010; **41**(5): 1048-50.
- 465 4. Dennis M, Mead G, Doubal F, Graham C. Determining the modified Rankin score after stroke by postal and  
466 telephone questionnaires. *Stroke* 2012; **43**(3): 851-3.
- 467
